1  
2  
3  
4  
5  
6  
7  
8  
9  
10  
11  
12  
13  
14  
15  
16  
17  
18  
19  
20  
21  
22  
23  
24  
25  
26  
27  
28  
29  
30  
31  
32  
33  
34  
35  
36  
37  
38  
39  
40  
41  
42  
43  
44  
45  
46  
47  
48

## Automated *in vivo* tracking of cortical oligodendrocytes

Yu Kang T. Xu<sup>1,2</sup>, Cody L. Call<sup>1</sup>, Jeremias Sulam<sup>2,3</sup>, Dwight E. Bergles<sup>1,2</sup>

<sup>1</sup>The Solomon Snyder Department of Neuroscience, Johns Hopkins University, Baltimore, Maryland, USA

<sup>2</sup>Kavli Neuroscience Discovery Institute

<sup>3</sup>Department of Biomedical Engineering, Johns Hopkins University, Baltimore, Maryland, USA

Abstract: 217

Introduction: 644

Materials and Methods: 2054

Results: 2799

Discussion: 1403

8 Figures

3 Supplemental Figures

4 Videos

Corresponding Author:

Dwight E. Bergles

49 **ABSTRACT**

50 Oligodendrocytes exert a profound influence on neural circuits by accelerating axon potential  
51 conduction, altering excitability and providing metabolic support. As oligodendrogenesis  
52 continues in the adult brain and is essential for myelin repair, uncovering the factors that control  
53 their dynamics is necessary to understand the consequences of adaptive myelination and  
54 develop new strategies to enhance remyelination in diseases such as multiple sclerosis.  
55 Unfortunately, few methods exist for analysis of oligodendrocyte dynamics, and even fewer are  
56 suitable for *in vivo* investigation. Here, we describe the development of a fully automated cell  
57 tracking pipeline using convolutional neural networks (*Oligo-Track*) that provides rapid  
58 volumetric segmentation and tracking of thousands of cells over weeks *in vivo*. This system  
59 reliably replicated human analysis, outperformed traditional analytic approaches, and extracted  
60 injury and repair dynamics at multiple cortical depths, establishing that oligodendrogenesis after  
61 cuprizone-mediated demyelination is suppressed in deeper cortical layers. Volumetric data  
62 provided by this analysis revealed that oligodendrocyte soma size progressively decreases after  
63 their generation, and declines further prior to death, providing a means to predict cell age and  
64 eventual cell death from individual time points. This new CNN-based analysis pipeline offers a  
65 rapid, robust method to quantitatively analyze oligodendrocyte dynamics *in vivo*, which will aid in  
66 understanding how changes in these myelinating cells influence circuit function and recovery  
67 from injury and disease.

68

69

70

71

72

## 73 INTRODUCTION

74 Advances in genetically encoded fluorescent indicators, CRISPR-mediated gene editing and  
75 multiphoton microscopy provide unprecedented opportunities for studying cellular dynamics at  
76 single-cell resolution in the brains of living animals. While these approaches hold the potential  
77 for profound discoveries about brain function, they also come with a host of quantitative  
78 challenges. In particular, living brain tissue is unstable; tissue warping disrupts image quality  
79 and uneven refractive indices increase noise and produce anisotropic distortions during  
80 longitudinal image acquisition (Lecoq et al., 2019). Moreover, large multi-dimensional datasets  
81 are cumbersome to quantify, and often require specialized software for 4D visualization and  
82 manual curation (Pidhorskyi et al., 2018). As imaging tools become more advanced and enable  
83 researchers to delve deeper into the brain *in vivo* (Horton et al., 2013), the challenges  
84 associated with quantification of enormous datasets become more acute. Further advances  
85 depend critically on the availability of robust analysis platforms to rapidly extract multi-  
86 dimensional observations about cellular dynamics.

87         Developing rigorous analysis tools for *in vivo* investigation of oligodendrocytes is  
88 particularly important. Oligodendrocytes enhance the speed of action potential conduction by  
89 ensheathing neuronal axons with concentric wraps of membrane, support neuronal metabolism  
90 and control neuronal excitability (Simons and Nave, 2016; Larson et al., 2018). While the  
91 population of neurons in the brain remains relatively stable throughout life (Bhardwaj et al.,  
92 2006; Ming and Song, 2011), new oligodendrocytes are generated in the adult CNS, allowing for  
93 dynamic alteration of myelin patterns in both healthy and pathological conditions (El Waly et al.,  
94 2014). This dynamism highlights the need for automated, longitudinal tracking tools to quantify  
95 the location, timing and extent of myelin plasticity within defined circuits in response to particular  
96 behavioral paradigms, as well as the regeneration of oligodendrocytes after demyelination  
97 (Bergles and Richardson, 2015). In this study, we sought to develop fully automated

98 methodologies to overcome the analytic challenges associated with longitudinal tracking of  
99 oligodendrocytes *in vivo*.

100         Currently, most available cell tracking algorithms are designed for *in vitro* analysis and  
101 are not readily adaptable to *in vivo* conditions (Van Valen et al., 2016; Zhong et al., 2016; Nketia  
102 et al., 2017; Lugagne et al., 2020; Wang et al., 2020). The few *in vivo* tracking algorithms that  
103 exist are modality specific and cannot be readily adapted to our fluorescent longitudinal datasets  
104 (Acton et al., 2002; Nguyen et al., 2011). The closest *in vivo* tools that can be applied to  
105 oligodendrocyte datasets are those developed for analyzing calcium imaging (Pachitariu et al.,  
106 2017; Giovannucci et al., 2019). However, calcium imaging tools normally work best with high-  
107 frame rate videos taken over seconds, rather than image volumes collected on a weekly basis  
108 that often experience large-scale tissue warping between imaging sessions. To resolve this  
109 longitudinal volumetric tracking challenge, we opted to use convolutional neural networks  
110 (CNN), which are known to find accurate efficient solutions to high-dimensional problems.  
111 Convolutional kernels allow CNNs to adaptively assess local features and global spatial  
112 relationships to make tracking decisions that are more perceptual, or human-like. Moreover,  
113 additional techniques such as transfer learning can help trained models generalize to entirely  
114 new imaging challenges with minimal new training data (Zhuang et al., 2020), extending their  
115 use to other contexts.

116         Here, we describe the development of *Oligo-Track*, a fast and reliable cell tracker for *in*  
117 *vivo* semantic segmentation of oligodendrocyte dynamics across cortical layers in longitudinal  
118 imaging experiments. We validated our algorithm using the cuprizone model of demyelination *in*  
119 *vivo* and show that *Oligo-Track* outperforms traditional analytic approaches in extracting  
120 dynamics of oligodendrogenesis at greater depths than previously available with manual  
121 annotation. Moreover, this approach generated volumetric segmentations of tracked cells that  
122 were inaccessible to human analysis, due to the considerable time investment required for  
123 manual volumetric tracing. This volumetric data revealed that oligodendrocyte soma size varies

- 124 predictably with age and proximity to death, allowing additional information about the timing of
- 125 oligodendrogenesis and cell death to be extracted from fixed timepoint imaging experiments.

126 **MATERIALS and METHODS:**

127 **Animal care and use**

128 Female and male adult mice were used for experiments and randomly assigned to experimental  
129 groups. All mice were healthy and did not display any overt behavioral phenotypes, and no  
130 animals were excluded from the analysis. Generation and genotyping of BAC transgenic lines  
131 from *Mobp-EGFP* (GENSAT) have been previously described (Hughes et al., 2018). Mice were  
132 maintained on a 12 hr light/dark cycle, housed in groups no larger than 5, and food and water  
133 were provided ad libitum (except during cuprizone-administration, see below). All animal  
134 experiments were performed in strict accordance with protocols approved by the Animal Care  
135 and Use Committee at Johns Hopkins University.

136

137 **Cranial windows**

138 Cranial windows were prepared as previously described (Holtmaat et al., 2012; Hughes et al.,  
139 2018; Orthmann-Murphy et al., 2020). Mice aged 7 to 10 weeks were deeply anesthetized with  
140 isoflurane (5% with 1 L/min O<sub>2</sub> induction; 1.5–2% with 0.5 L/min maintenance), the head  
141 shaved, and the scalp removed to expose the skull. The skull was cleaned and dried and a  
142 position over somatosensory cortex (–1.5 mm posterior and 3.5 mm lateral from bregma) was  
143 marked for drilling. A custom aluminum headplate with a central hole was cemented onto the  
144 skull (C and B Metabond) and fixed in place with custom clamping headbars. A 2 mm x 2 mm  
145 square or 3 mm x 3 mm circle of skull was removed using a high-speed dental drill. A coverslip  
146 (VWR, No. 1) the size of the craniotomy was put in its place and sealed with cyanoacrylate glue  
147 (Vetbond and Krazy glue).

148

149 ***In vivo* two photon microscopy**

150 *In vivo* imaging was performed as previously described (Orthmann-Murphy et al., 2020). After  
151 two to three weeks of recovery from cranial window surgery, baseline images of the cortex were

152 acquired with two photon microscopy on a Zeiss LSM 710 microscope (average power at  
153 sample < 30 mW). Image stacks were 425  $\mu\text{m}$   $\times$  425  $\mu\text{m}$   $\times$  550  $\mu\text{m}$  or 850  $\mu\text{m}$   $\times$  850  $\mu\text{m}$   $\times$  550  
154  $\mu\text{m}$  (1024  $\times$  1024 pixels; corresponding to layers I – IV), relative to the pia. Mice were  
155 subsequently imaged weekly for up to 12 weeks.

156

### 157 **Cuprizone treatment**

158 Directly following baseline two photon image acquisition, mice were switched from regular diet  
159 to a diet consisting of milled, irradiated 18% protein chow (Teklad Global) supplemented with  
160 0.2% w/w bis(cyclohexanone) oxaldihydrazone (“cuprizone,” Sigma). Control mice received only  
161 the milled chow. After three weeks, mice returned to regular pellet diet for the duration of the  
162 recovery period (Orthmann-Murphy et al., 2020).

163

### 164 **Analytic pipeline overview**

165 Timeseries acquired from our two-photon imaging setup were first registered using ImageJ’s  
166 correct 3D drift plugin (Schindelin et al., 2012; Parslow et al., 2014), which accounted for major  
167 alignment shifts from week to week. Registered timeseries were then analyzed crop-by-crop  
168 using our segmentation CNN (Seg-CNN) which identified cell somas on a voxel-wise basis.  
169 These cell somas were then extracted as individual seeds for our tracking CNN (Track-CNN)  
170 that identified the location of each seeded cell soma on a subsequent time point. In parallel, we  
171 also developed a cell tracking method based on traditional imaging informatics approaches that  
172 used the structural similarity index (SSIM) (Zhou Wang et al., 2004) and local tissue movement  
173 calculations to track cells. This heuristic model was used as a baseline to assess the  
174 improvements of our Track-CNN approach. Cells tracked by either Track-CNN or our heuristic  
175 method were also curated by human researchers using syGlass virtual reality software  
176 (Pidhorskyi et al., 2018) to assess the accuracy of tracking. Some of these curated traces were

177 also returned to the training pipeline to improve our deep learning approaches in a positive-  
178 feedback loop (Figure 2A).

179

## 180 **Training data generation**

181 All training data was curated by a human expert using syGlass software to provide point  
182 coordinates. To obtain volumetric segmentations, we trained an *ilastik* random forest regressor  
183 (Berg et al., 2019) to procure an over-sensitive voxel-wise segmentation model. Then, we  
184 excluded every *ilastik* identified object that did not overlap with a ground truth point coordinate  
185 to eliminate false positives in our over-sensitive *ilastik* model. Datasets were pooled from 12  
186 animals and multiple treatment conditions. Image scales were standardized to 0.83  $\mu\text{m}/\text{pixel}$  in  
187 XY and 3  $\mu\text{m}/\text{pixel}$  in Z. Data was cropped to the appropriate input size for each respective  
188 neural network: Track-CNN 256  $\times$  256  $\times$  64 voxels, and seg-CNN 128  $\times$  128  $\times$  32 voxels.  
189 Overall, Seg-CNN was trained with 6,828 training volumes and 759 validation volumes. Track-  
190 CNN was trained with 38,696 volumes and a validation set containing 4,300 volumes.

191

## 192 **Segmentation CNN training and inference**

193 Seg-CNN employed a UNet architecture (Ronneberger et al., 2015) with 3D convolutional  
194 kernels built in Pytorch 1.6 (Paszke et al., 2017). The neural network took as input a 256  $\times$  256  
195  $\times$  64 voxel volume containing fluorescently labelled oligodendrocytes in a single image channel  
196 (Figure 2B). The downsampling branch of the CNN contained 5 convolutional blocks with 5  $\times$  5  
197  $\times$  5 filters, batch normalization, and max pooling to downsample the data and extract local  
198 features. The upsampling branch employed the same blocks in reverse. Max pooling operations  
199 were replaced by trilinear upsampling and 1  $\times$  1  $\times$  1 convolutions to resize the image back to the  
200 same input size while extracting global spatial features (Supplementary Figure S1). A final 1  $\times$  1  
201  $\times$  1 convolution reduced the output to a two-channel volume which was softmaxed with a  
202 threshold of 0.5 to two classes corresponding to background and cell soma. Training was



203 performed using a batch size of 2 for 30 epochs on an RTX 2080 Ti GPU. Loss was calculated  
204 as cross entropy and optimized using an Adam optimizer with weight decay (Loshchilov and  
205 Hutter, 2019) set at a learning rate of  $10^{-5}$ . During inference on unseen data, entire timeseries  
206 were fed to the neural network one timepoint at a time. Our algorithm then acquired  $256 \times 256 \times$   
207  $64$  voxel crops from these volumes with 50% overlap to ensure all regions were assessed. Each  
208 crop was fed to Seg-CNN individually. The output segmentations of individual crops, with 50%  
209 overlap, were summed together and binarized before being stitched back into a full volume. The  
210 final analyzed timeseries is saved and returned to the user (Figure 2B).

211

### 212 **Track-CNN training and inference**

213 Track-CNN employed a similar architecture to Seg-CNN except for a filter size of  $7 \times 7 \times 7$  for  
214 each convolution and a three channel  $128 \times 128 \times 32$  voxel input for our “seed-based” training  
215 approach. Seed-based training was employed to draw the attention of our CNN to individual  
216 cells in a volume by marking a cell of interest with a binary mask, or “seed” (Figure 3A). The  
217 input is thus a three-channel volume where channel 1 contains a raw fluorescence volume  
218 cropped from timepoint  $t$  and centered around a cell soma of interest. Channel 2 contains the  
219 binary mask/seed to indicate the cell of interest on timepoint  $t$ . All adjacent cells excluding the  
220 seed are set to a lower value. Finally, channel 3 contains a raw fluorescence volume cropped  
221 from timepoint  $t + 1$  but centered around the same position as in channel 1 (Figure 3A). In  
222 summary, this input provides the raw fluorescence from two consecutive timepoints and also  
223 indicates which cell we wish to track from timepoint  $t$  to timepoint  $t + 1$  using the binary mask in  
224 channel 2. Thus, the ground truth for optimization is a binary volumetric mask indicating the  
225 location of the cell of interest on timepoint  $t + 1$  (Figure 3A). Training was performed using a  
226 batch size of 4 for 18 epochs on an RTX 2080 Ti GPU. Loss was calculated as cross entropy  
227 and optimized using Adam optimizer with weight decay (Loshchilov and Hutter, 2019) set at a  
228 learning rate of  $10^{-5}$  that was dropped to  $10^{-6}$  at 13 epochs. During inference, volumes were

229 cropped around each cell of interest in timepoint  $t$  along with seed masks and crops from  
230 timepoint  $t + 1$  to form a three-channel input for Track-CNN. This is repeated until all cells on  
231 timepoint  $t$  are assessed. Unassociated cells on  $t + 1$  are then added as newly formed  
232 oligodendrocytes to our list of candidate cells, and the analysis continues until all consecutive  
233 timepoints are tested (Figure 3A).

234

### 235 **Post-processing**

236 To prevent misalignment of tracks, we included one major post-processing step in our analytic  
237 pipeline. We first noticed that, given a human tracked dataset, we could predict the location of a  
238 cell body on a subsequent timepoint within  $\sim 10$  pixels error by using the local directional vector  
239 of the tracks of five nearest neighbor cells from timepoint  $t$  to  $t + 1$  (Figure 3B, C). Thus, given  
240 that Track-CNN accurately tracks the majority of cells between consecutive timepoints, we can  
241 use the average local vector shift of the five nearest neighbors of any cell to correct for tracks  
242 that have severely gone off-target ( $> 12$  pixel difference from predicted directional vector  
243 endpoint). These gross errors can then be re-evaluated. If an unassociated cell exists at the  
244 location of the predicted vector endpoint on  $t + 1$ , then the wrongly associated track now points  
245 to this unassociated cell. Otherwise, the track is terminated. We also included minor post-  
246 processing steps comprising of: (1) a minimum size threshold of 100 voxels for objects to be  
247 considered a cell soma; (2) objects that only exist on a single frame (excluding the first and last  
248 frame) are dropped, as they were likely to be debris.

249

### 250 **Heuristic baseline method**

251 Since no baseline methods exist for comparison, we developed an approach to assess the  
252 extent to which deep learning outperforms traditional imaging informatics methods. We  
253 developed a tracking program in MATLAB R2020a (Mathworks) where cells are cropped from  
254 timepoint  $t$  and assessed on a pair-wise basis to identify whether its' nearest neighbors on  $t + 1$

255 correspond to the same cell at timepoint  $t$ . To determine this association, we employed a few  
256 simple heuristics and rules: (1) successful tracking required a structural similarity index (SSIM)  
257 greater than 0.2 between cropped volumes from different timepoints. SSIM is an indicator of  
258 similarity that considers structure, intensity, and contrast-based differences between images.  
259 We applied the assumption that if a cell exists at  $t + 1$ , the overall local environment should look  
260 rather similar at timepoint  $t$ , thus a correct association would have a moderate to high SSIM. (2)  
261 Similar to the post-processing used for Track-CNN, we estimated the average vector of all  
262 nearest neighbors to model local tissue movement in a cropped field of view from  $t$  to  $t + 1$ . This  
263 allowed us to evaluate if the current track from  $t$  to  $t + 1$  flows in the same direction as the local  
264 shift of neighboring tracked cells. If the proposed track does not align with the local shift of  
265 neighboring tracked cells, then the track is terminated.

266

## 267 **SNR calculation**

268 Since there is no standard for defining signal-to-noise ratio (SNR) in fluorescence imaging (Zhu  
269 et al., 2012), we adapted a standard logarithmic signal-processing SNR equation for our usage:

$$270 \quad SNR = 10 * \log \left( \frac{P_{signal}}{P_{noise}} \right)$$

271 Where we defined  $P_{signal}$  as the average signal (meaningful input) and  $P_{noise}$  as the standard  
272 deviation of the background noise. However, since we have no reference image to define what  
273 perfect signal is in any raw dataset, we defined our signal to be any pixels above a certain value  
274  $j$  and noise to be any pixels below that value.

$$275 \quad \widehat{SNR}_j = 10 * \log \left( \frac{P_{signal \geq j}}{P_{noise < j}} \right)$$

276 Where  $P_{signal}$  is defined as the mean of all values above  $j$ , and  $P_{noise}$  is defined as the standard  
277 deviation of all values below  $j$ . Since  $j$  would otherwise be arbitrarily determined, we chose to

278 calculate  $j$  from the entire image volume using Otsu threshold for binarization (Otsu, 1979),  
279 providing us with a reference free metric of SNR.

280

## 281 **Statistical analysis**

282 All statistical analysis was performed using Python statsmodels and scipy libraries.  $N$   
283 represents the number of animals used in each experiment, unless otherwise noted. Data are  
284 reported as mean  $\pm$  SEM or median  $\pm$  SEM as indicated, and  $p < 0.05$  was considered  
285 statistically significant. Level of significance is marked on figures as follows: \* denotes  $p < 0.05$ ;  
286 \*\* denotes  $p < 0.01$ ; \*\*\* denotes  $p < 0.001$ .

287

## 288 **Code availability**

289 Packaged software code for *Oligo-Track* is readily available at [github.com/Bergles-](https://github.com/Bergles-lab/Xu_Bergles_2021_Oligo_Track)  
290 [lab/Xu\\_Bergles\\_2021\\_Oligo\\_Track](https://github.com/Bergles-lab/Xu_Bergles_2021_Oligo_Track) along with instructions for use. The algorithm is prepared to  
291 work independent of Linux and Windows operating systems, with minimum Python 3.6.

292

293

## 294 **RESULTS**

### 295 **Quantifying oligodendrocyte dynamics *in vivo* using CNN-assisted cell tracking**

296 To visualize individual oligodendrocytes in the cerebral cortex, cranial windows were surgically  
297 implanted in mice that express EGFP under control of the *Mobp* promoter/enhancer (Hughes et  
298 al., 2018; Orthmann-Murphy et al., 2020) (Figure 1A). Using two-photon microscopy, the somas  
299 and cytosolic processes of oligodendrocytes could be resolved up to a depth of  $\sim 400 \mu\text{m}$  from  
300 the pial surface (Figures 1B,C), providing the means to quantify changes in both the number  
301 and distribution of oligodendrocytes over weeks to months with repeated imaging. The dramatic  
302 increase in density of oligodendrocytes with depth (Figure 1C) presents challenges for  
303 unambiguous identification and increases the time necessary to mark and track cell positions

304 throughout a time series. To overcome this quantitative challenge, we trained two sequential  
305 CNNs employing a UNet architecture (Supplementary Figure S1), which we termed *Seg-CNN*  
306 and *Track-CNN*, to follow oligodendrocytes *in vivo* during repetitive bouts of imaging over many  
307 weeks (Figure 2A).

308 Images were first acquired over a  $850\ \mu\text{m} \times 850\ \mu\text{m} \times 550\ \mu\text{m}$  volume and then  
309 registered across time using ImageJ's correct 3D drift plugin (Schindelin et al., 2012; Parslow et  
310 al., 2014) to adjust for small offsets. Seg-CNN was then used to perform semantic segmentation  
311 to identify the position of all oligodendrocyte cell bodies within the imaging volume at each  
312 timepoint in the timeseries. This process was completed sequentially on  $256 \times 256 \times 64$  voxel  
313 volumes that were adaptively cropped with 50% spatial overlap to reduce the amount of  
314 computer memory required to perform the computations (Figure 2B). The resulting binary  
315 segmentations were then re-stitched to create a stacked timeseries. Image stacks from  
316 sequential time points were then analyzed using Track-CNN, which employs a "seed-based"  
317 inference approach to determine whether any specific cell of interest exists in a subsequent  
318 timepoint. For all comparisons, we defined a tracked cell (or cell track), as a set of locations  
319 where a binary object was determined to be the same cell over subsequent timepoints by an  
320 algorithm or human researcher. The displacement vector for any cell thus starts at a soma on  
321 timepoint  $t$  and ends at the same tracked soma on  $t + n$ . Cell identification in Track-CNN is  
322 accomplished by providing a three-channel input to the CNN, which includes (1) a crop of raw  
323 fluorescence from timepoint  $t$  centered around a cell of interest, (2) a binary seed-mask that  
324 emphasizes the current cell of interest, and (3) a crop of raw fluorescence from timepoint  $t + 1$   
325 that is centered around the cell on  $t$ . This allows the CNN output to be a volumetric  
326 segmentation of the same cell on timepoint  $t + 1$ , given a masked cell of interest on timepoint  $t$   
327 (Figure 3A). Additional post-processing was performed using local tissue movement vectors to  
328 detect gross errors in tracking between sequential timepoints (Figures 3B, C). This post-  
329 processing used the observation that the displacement vector for any cell can be predicted

330 within 10-pixel accuracy using the average displacement vectors of the nearest five tracked  
331 cells (Figure 3C). Thus, any cells with displacement vectors that varied drastically from  
332 predicted vectors, calculated from nearest neighbor tracks, could be classified as incorrect  
333 associations. Overall, during training, Seg-CNN performance plateaued after ~30 epochs,  
334 demonstrating accurate segmentation of cell somas relative to ground truth (Jaccard overlap  
335 index ~0.7) and detection of cells across all volumes (95% sensitivity, 91% precision;  
336 Supplementary Figure S2A). Track-CNN performance plateaued after ~5 epochs with highly  
337 accurate track associations (98% accuracy, 99% sensitivity, and 99% precision; Supplementary  
338 Figure S2B).

339 To determine if this CNN-based method outperforms a heuristic cell tracking method that  
340 employs similarity metrics and local tissue movement modeling, similar to the post-processing  
341 mentioned above, we tested both algorithms for their ability to extract biological trends of  
342 spontaneous cell regeneration in the cuprizone model of demyelination (Chang et al., 2012;  
343 Baxi et al., 2017; Hughes et al., 2018; Orthmann-Murphy et al., 2020). In this model, mice are  
344 fed cuprizone for three weeks, resulting in loss of >95% of oligodendrocytes in the upper layers  
345 of cortex, which are progressively regenerated as the mice are returned to a normal diet (Figure  
346 4A). Both CNN and heuristic models detected the general trend of cell loss during the first three  
347 weeks of cuprizone treatment and subsequent oligodendrogenesis during recovery, as  
348 assessed relative to human counting (Figure 4B). However, closer examination revealed that  
349 *Oligo-Track* provided a more accurate accounting of cell dynamics. In particular, the heuristic  
350 method greatly mis-identified existing cells as being newly formed (Figure 4C), suggesting  
351 disrupted tracking. This conclusion was further supported by the increased number of wrongly  
352 terminated cell tracks by the heuristic algorithm at each timepoint (Figure 4D), suggesting that  
353 the heuristic approach often failed to identify existing oligodendrocytes in subsequent time  
354 points. We also assessed the difference in track length (persistence of cells during the time  
355 series) between ground truth and machine outputs (Figure 4E). Positive values in this plot

356 indicate under-tracking, where the machine failed to track a cell in subsequent timepoints, while  
357 negative values indicate over-tracking, where the machine tracked a cell onto additional  
358 timepoints despite cell elimination determined in the ground truth. This graph reveals that Track-  
359 CNN markedly reduced the total rate of over-tracked segments errors two-fold from the heuristic  
360 algorithm (Figure 4F). Moreover, the severe error rate (under or over-tracking for > 1 timepoint)  
361 decreased almost five-fold. Together, these findings indicate that *Oligo-Track* provides  
362 substantial benefits for following oligodendrocytes in longitudinal 3D imaging datasets.

363

### 364 **CNN-based analysis retains tracking ability despite changes in image quality**

365 Many factors can influence image quality *in vivo*, limiting the ability to accurately assess cell  
366 dynamics. Cranial windows can become obscured by local inflammation at later (or earlier)  
367 timepoints, resulting in incorrect track associations by both humans and machines. Image scale,  
368 cellular debris, and laser power also commonly vary between experiments and impair  
369 implementation of standardized analyses. To assess the impact of these factors on our tracking  
370 algorithm, we started by first varying image scale, using bilinear interpolation to up- or down-  
371 sample raw data before performing Track-CNN analysis. The algorithm was mostly scale  
372 invariant, but struggled with up-sampling beyond two-fold (Figure 5A,B) showing that, optimally,  
373 input data should be scaled to the same 0.83  $\mu\text{m}/\text{pixel}$  XY and 3  $\mu\text{m}/\text{pixel}$  in Z resolution as the  
374 training dataset.

375 We then assessed the impact of cranial window/image quality on tracking, using a  
376 custom reference free signal-to-noise (SNR) metric. We chose two representative imaging  
377 volumes, one from a mouse with an optimal cranial window, and one from a mouse with a  
378 window that had not yet become optically clear. The obscured window reduced the detection of  
379 fluorescence at lower cortical depths. Our average SNR metric clearly delineated the depth-  
380 dependent decay of image quality, as the SNR in maximum projections of the obscured volume  
381 dropped rapidly after a depth of 200  $\mu\text{m}$  (Figure 5C,D). This image quality decay was verified

382 visually, and while Seg-CNN still generalized and was able to identify oligodendrocyte somata in  
383 deeper layers despite the reduction in SNR, it was clear that many cells were obscured from  
384 view from both machine and human trackers (Figure 5C). By visual assessment, we set a  
385 threshold of SNR  $\sim$  1.5 dB as a limit under which image quality becomes a concern for *Oligo-*  
386 *Track* analysis. Fluctuations in SNR between timepoints can lead to disrupted tracking as cells  
387 are arbitrarily obscured and falsely labelled as terminated or newly formed. This threshold was  
388 incorporated into our pipeline and offers users a warning during implementation of the algorithm.

389 Seg-CNN was also able to avoid some fluorescent, non-cellular components or weak  
390 cellular autofluorescence associated with cells other than oligodendrocytes, which can be  
391 difficult for non-deep learning approaches (Supplementary Figure 3A). However, the  
392 overwhelming density of brightly autofluorescent debris, such as lipofuscin found near the pial  
393 surface, were sometimes detected as false positives by Seg-CNN (Supplementary Figure 3B).  
394 We suggest that researchers using this software avoid areas with dense debris or lipofuscin, or  
395 at least exclude these regions from analysis, although this can be difficult when imaging in aged  
396 tissue (Moreno-García et al., 2018; A. Yakovleva et al., 2020). We also determined that while  
397 low imaging power impairs cell detection, post-hoc adjustments of the intensity histogram  
398 towards higher values recovered some undetected cells (Supplementary Figure 3C). Finally, we  
399 found that Track-CNN was robust to some variations in noise and motion blur. This was  
400 assessed by applying sequentially larger standard deviations of noise (10, 40, 50) and  
401 increasing the rotation range of random motion artifacts (4, 6, 10 degrees) using the *Torchio*  
402 python library (Pérez-García et al., 2021) (Supplementary Figure 3D,E). Together, this analysis  
403 shows that *Oligo-Track* can maintain performance despite changes in environmental variables  
404 that affect the distribution of the data. Moreover, we demonstrated that pre-processing of input  
405 data, such as intensity adjustments and the exclusion of regions with high debris or low SNR,  
406 can reduce instances of inaccurate tracking.

407



408 **CNN detects layer-specific suppression of oligodendrogenesis at extended depth**

409 To assess the capacity of our pipeline to extract biological trends, we used the fully automated  
410 system to analyze oligodendrocyte dynamics for up to 12 weeks in cuprizone treated and non-  
411 treated control mice. As anticipated, cuprizone treatment resulted in a predictable time course of  
412 oligodendrocyte degeneration and subsequent regeneration after mice were no longer exposed  
413 to the drug, while control mice gradually added oligodendrocytes over several weeks  
414 (Orthmann-Murphy et al., 2020) (Figures 6A,B, Videos 1 and 2). Moreover, when cells were  
415 segregated into 100  $\mu\text{m}$  thick blocks from the pial surface, greater suppression of  
416 oligodendrocyte regeneration was observed in the deeper layers of the cortex (Figure 6C), as  
417 reported previously (Orthmann-Murphy et al., 2020). The sensitive detection of *Oligo-Track*  
418 allowed rapid extension of the analysis by another 100  $\mu\text{m}$  (300 – 400  $\mu\text{m}$  block), revealing that  
419 regeneration was even less efficient than in the area above, providing further evidence of the  
420 depth dependent decline in oligodendrocyte regeneration in the somatosensory cortex.

421 It is possible that the higher demand for oligodendrocyte regeneration in deeper cortical  
422 layers outstrips the regenerative capacity of OPCs (Hughes et al., 2013; Streichan et al., 2014).  
423 If the extent of oligodendrogenesis is limited by the availability of local cues or accumulation of  
424 myelin debris, then newly generated cells should preferentially appear in regions with lower  
425 initial oligodendrocyte density (and lower oligodendrocyte death) (Orthmann-Murphy et al.,  
426 2020). Our prior studies indicate that new oligodendrocytes do not regenerate in locations  
427 where previous cells had died, suggesting possible inhibition of proliferation by myelin debris  
428 after cell death (Lampron et al., 2015; Gruchot et al., 2019). As a measure of sparsity, we  
429 calculated the average distance from each cell to its five nearest neighbors. We limited our  
430 analysis to the first 300  $\mu\text{m}$  of the cortex to avoid errors in sparsity calculations due to the lack of  
431 tracked nearest-neighbor cells past 400  $\mu\text{m}$  depth. Given this measure, we found that there was  
432 no strong correlation between sparsity, cell death or regeneration (Figures 6D,E and Video 3),  
433 suggesting that cell death and regeneration are not strongly influenced by local oligodendrocyte

434 density at baseline. Rather, global gradients of inhibitory factors such as cytokines released by  
435 astrocytes, which become persistently reactive in deeper layers of the cortex after cuprizone  
436 mediated demyelination (Orthmann-Murphy et al., 2020), may inhibit oligodendrocyte precursor  
437 cell differentiation (Skripuletz et al., 2008; Zhang et al., 2010; Su et al., 2011; Chang et al.,  
438 2012; Kirby et al., 2019).

439

#### 440 **Volumetric segmentation enables identification of newly born oligodendrocytes**

441 Oligodendrocytes undergo dramatic morphological changes as they transition from progenitors  
442 to mature myelinating cells, accompanied by an elaboration of myelin forming processes and  
443 changes in soma size (Kuhn et al., 2019). To quantify the time course of these somatic  
444 changes, we analyzed volumetric morphological data provided by *Oligo-Track*, from longitudinal  
445 imaging datasets where the birth date of newly formed oligodendrocytes was known. We limited  
446 our investigation to the first 300  $\mu\text{m}$  of the cortex as tissue refraction often reduced brightness of  
447 cells in deeper cortical layers, resulting in inaccurate measurement of cell soma volume from  
448 dim fluorescence. This analysis revealed oligodendrocyte soma size was highly correlated with  
449 cell age. Most newly formed oligodendrocytes had larger cell bodies than stable cells at any  
450 timepoint across all depths (Figure 7A and Video 4). Projecting this across cell age, the soma  
451 volume of newly formed oligodendrocytes decayed exponentially over subsequent weeks from  
452 first appearance (Figure 7B,C;  $p < 0.001$  @ 1 week,  $p=0.027$  @ 2 weeks; Kruskal-Wallis test  
453 with Dunn's post-hoc analysis). Moreover, the average volume of newly generated cells, post-  
454 cuprizone injury, was significantly higher compared to stable mature cells in control animals up  
455 to 3 weeks after oligodendrogenesis (Figure 7D;  $1.6 \pm 0.04$  fold change  $p<0.001$  and  $D=1.29$  @  
456 1 week,  $1.4 \pm 0.04$  fold change  $p<0.001$  and  $D=0.85$  @ 2 weeks,  $1.2 \pm 0.03$  fold change  
457  $p<0.001$  and  $D=0.33$  @ 3 weeks,  $1.0 \pm 0.03$  fold change  $p=0.39$  and  $D=0.07$  @ 4 weeks;  
458 Kruskal-Wallis test with Dunn's post-hoc analysis and Cohen's effect size calculation). To  
459 confirm that this size difference is not associated with cuprizone induced changes, we also

460 compared the volume of spontaneously generated oligodendrocytes in control animals with their  
461 stable counterparts and found that newly formed cells also had significantly larger cell somata  
462 (Figure 7D;  $1.7 \pm 0.09$  fold change  $p < 0.001$  and  $D=1.22$  @ 1 week,  $1.4 \pm 0.07$  fold change  
463  $p < 0.001$  and  $D=1.1$  @ 2 weeks,  $1.3 \pm 0.06$  fold change  $p < 0.001$  and  $D=0.54$  @ 3 weeks,  $1.0 \pm$   
464  $0.05$  fold change  $p=0.28$  and  $D=0.09$  @ 4 weeks; Kruskal-Wallis test with Dunn's post-hoc  
465 analysis and Cohen's effect size calculation). Thus, the increased soma size of newly formed  
466 oligodendrocytes is an innate biological phenomenon, rather than a response to cuprizone  
467 exposure.

468           Given the substantially larger cell somas of newly formed oligodendrocytes, we  
469 assessed the predictive power of cell soma size as an indicator of cell age. To examine the  
470 probability that a cell soma of a certain volume is exactly a certain age or within a range of ages,  
471 we plotted the kernel density estimate (KDE) for each distribution of soma volumes at different  
472 timepoints (Figure 7E). The KDE offers a normalized estimate of the probability density function  
473 such that we can visualize the probability of multiple conditions simultaneously. For example,  
474 we observed that a cell with a soma volume greater than  $5000 \mu\text{m}^3$  has an almost 100% chance  
475 of being exactly 1 week old from time of differentiation. Similarly, cell somata between the range  
476 of  $3500 - 5000 \mu\text{m}^3$  are most likely less than 2 weeks old, while somata larger than  $3000 \mu\text{m}^3$   
477 are likely newly generated cells within the first 3 weeks post-differentiation (Figure 7E). Finally,  
478 by comparing the mean soma volume of stable control oligodendrocytes to newly formed cells  
479 at multiple timepoints, we also confirmed the statistical significance of the predictive relationship  
480 between soma volume and cell age (Figure 7F;  $p < 0.001$  all comparisons; 1-way ANOVA with  
481 Tukey's Honest Significant Difference post-hoc test).

482

### 483 **Oligodendrocyte death can be predicted from soma size**

484 Oligodendrocyte death is typically preceded by nuclear condensation and shrinkage of the soma  
485 (Bortner and Cidlowski, 2002; Miller and Zachary, 2017). To determine if the soma size analysis

486 could also be used to predict whether an oligodendrocyte will later degenerate, we plotted the  
487 soma volumes of all cells later observed to degenerate. After multiple weeks of cuprizone  
488 treatment, the median soma volume of all cells shrank significantly (Figures 8A–C, Video 4;  
489  $p < 0.001$  @ 1 week, 2 weeks and 3 weeks), consistent with the high degree of oligodendrocyte  
490 degeneration observed in the cortex. When compared to oligodendrocytes at comparable  
491 timepoints in control mice, soma size was also significantly smaller after extended cuprizone  
492 treatment (Figure 8D;  $0.83 \pm 0.013$  fold change  $p < 0.001$  and  $D = 0.26$  @ 1 week,  $0.73 \pm 0.013$   
493 fold change  $p < 0.001$  and  $D = 0.65$  @ 2 weeks,  $0.6 \pm 0.015$  fold change  $p < 0.001$  and  $D = 1.1$  @ 3  
494 weeks; Kruskal-Wallis test with Dunn’s post-hoc analysis and Cohen’s effect size calculation),  
495 consistent with progression to apoptosis. Given the large statistical power when sampling  
496 thousands of cells, we additionally defined a significant difference in soma volume as one  
497 having a medium to large effect size ( $> 0.5$  Cohen’s  $D$ ), which only occurred at 2 and 3 weeks of  
498 cuprizone treatment. Assessing the predictive power of soma volume again, we attempted to  
499 predict the likelihood that a cell would die within the next subsequent week given that the cell is  
500 smaller than a certain soma volume. While not as striking as the predictive power for newly  
501 formed oligodendrocytes, the probability that cells with somata below  $500 \mu\text{m}^3$  would disappear  
502 within one week was over 90% (Figures 8E,F). Together, this analysis reveals that the size of  
503 oligodendrocyte somata calculated using deep neural networks can be used to predict, without  
504 prior or later longitudinal imaging data, whether a cell was recently generated and whether it is  
505 likely to degenerate.

506

507

## 508 **DISCUSSION**

509 To facilitate analysis of oligodendrocyte dynamics in the adult brain we designed *Oligo-Track*, a  
510 deep learning pipeline that uses two sequential CNNs to allow cell tracking in volumetric  
511 imaging datasets. This methodology provides a substantial improvement over traditional

512 imaging informatics approaches as it was faster, less subject to user bias and less influenced by  
513 factors that commonly deteriorate image quality, allowing reliable automated cell tracking over  
514 time series spanning multiple weeks. This automated volumetric analysis enabled us to increase  
515 the number of oligodendrocytes analyzed in deeper layers of the mouse cortex and to identify  
516 newly formed oligodendrocytes and those that are in the process of degenerating simply based  
517 on soma size at a single time point without longitudinal tracking information.

518         This CNN tracking pipeline follows a two-step approach to optimize multi-object tracking  
519 (MOT). We first setup a detection step, where oligodendrocytes are identified in a volume,  
520 followed by an association step, to link tracked cells across time frames (Ciaparrone et al.,  
521 2020). Unlike other deep learning MOT approaches, which often only use CNNs to generate  
522 bounding boxes or extract features (Ciaparrone et al., 2020), we employed two sequential  
523 CNNs that both performed semantic segmentation in the MOT detection and association stages  
524 (Seg-CNN and Track-CNN, respectively). The output of this pipeline provides not only the  
525 location of all tracked cells, but also the volume of each cell soma. This volumetric tracking was  
526 made possible by training our association network (Track-CNN) with a seed-based learning  
527 approach. Previous studies have shown that, when given input data containing several cells,  
528 one can mark cells of interest with a binary mask, or “seed”, to draw the attention of CNNs (Xu  
529 et al., 2019). This forces a semantic classifier to not only learn to identify oligodendrocyte  
530 somas, but also to identify the somas of individually marked cells of interest across different  
531 timepoints.

532         From a computational standpoint, there are several advantages to this automated  
533 approach. Roughly estimating the time for manual analysis with syGlass, a 3D virtual reality  
534 based visualization tool, we found that a 10-week, 10-timepoint dataset with a size of 800 × 800  
535 × 300 μm per timepoint would take a researcher approximately six hours to identify and track all  
536 oligodendrocytes within this volume. This estimate only considers the time to place point  
537 coordinates and does not include the considerable additional time it would take to trace every

538 voxel to generate volumetric segmentations. This estimate also does not consider how much  
539 longer manual analysis would take without access to specialized VR software (e.g. syGlass). By  
540 comparison, *Oligo-Track* requires ~20 minutes for Seg-CNN segmentation (~2 minutes per  
541 timepoint) and ~25 – 35 minutes for Track-CNN associations for the same volume across 10  
542 timepoints, for a total analysis time of 45 – 55 minutes, more than six times faster than achieved  
543 with VR-assisted manual tracking, just for cell identification. This processing time is also purely  
544 computational, so manual labor time is reduced to almost zero, and offers fully volumetric  
545 segmentations. Total runtime will vary depending on cell density, number of timepoints, the size  
546 of volumes during inference and the exact computer configuration.

547 Standardization of methodology and accuracy are also important advantages of the CNN  
548 analysis approach. Losing dimensionality can be extremely detrimental to quantification speed  
549 and accuracy, as cells can often lie on top of one another or shift in unpredictable ways that can  
550 be missed if viewing 4D data in lower dimensional space. As many researchers do not yet have  
551 access to 4D visualization/tracking tools, *Oligo-Track* standardizes the approach to longitudinal  
552 cell tracking, removing the reliance on specialized proprietary software and reducing tracking  
553 inconsistencies between individuals.

554 Although there are clear technical advantages of using CNNs to track cells over time, the  
555 decision to use deep learning as an underlying analytic framework comes with additional  
556 considerations. Deep learning is often criticized for its “black box” nature, as researchers are  
557 unable to understand the intricate decision-making process of millions of weighted connections  
558 in a CNN, resulting in sometimes unpredictable behavior (Heaven, 2019; Yampolskiy, 2019).  
559 For example, as we see in our own network, it was difficult to define the exact level of debris  
560 avoidance that the neural network was capable of, and why certain debris were more likely to be  
561 identified as false positives. This variability could be addressed in future work by data  
562 augmentation, whereby data containing high levels of real or synthetic debris could be  
563 introduced during CNN training. Currently, we partially addressed the unpredictability of deep

564 learning by using VR-based 4D manual curation post-CNN analysis to ensure accuracy in  
565 unpredictable scenarios. We also used these post-hoc manually curated datasets to further  
566 improve the CNNs, highlighting a major advantage of deep learning approaches. CNN models  
567 are extraordinarily data hungry and can be continuously improved with new training data that  
568 help generalize to new imaging conditions (Klabjan and Zhu, 2020). For instance, while *Oligo-*  
569 *Track* has only been trained on cells up to 400  $\mu\text{m}$  depth in the cortex, it will be possible to  
570 further train these networks to imaging conditions in deeper cortical layers. This training  
571 advantage is not available for traditional algorithms that may require extensive manual fine-  
572 tuning for extrapolation to slight variations in imaging conditions.

573         While the main limiting factor for developing deep learning technologies is the generation  
574 of large ground-truth training datasets to reach optimal performance levels, there are a growing  
575 number of methods by which researchers can reduce this high data demand of CNNs. For  
576 instance, transfer learning techniques have demonstrated how a network that is pretrained on a  
577 large dataset can be rapidly adapted to a new dataset with minimal new training data (Zhuang  
578 et al., 2020). Given the large database that our network was trained on, and the relatively similar  
579 features of cells that express fluorescent proteins, our pretrained CNN can serve as a basis for  
580 additional tool development, in which transfer learning is used to adapt this model to other cell  
581 types, where ground truth training data may not be readily available.

582         Automated quantitative tools will play a growing, critical role in the age of big data that is  
583 spurred by advances in biological imaging technologies. Of note for oligodendrocyte biology,  
584 three photon imaging promises to take us deeper *in vivo* (Horton et al., 2013; Lecoq et al.,  
585 2019), allowing us to examine the dynamics of these myelinating cells in layers 5 and 6 of the  
586 cortex and perhaps even into the white matter of the corpus callosum. Additionally, block-face  
587 imaging presents us with the opportunity to examine distributions of oligodendrocytes across the  
588 entire mouse brain, correlating myelination patterns with neuron type and brain region (Ragan et  
589 al., 2012; Amato et al., 2016; Winnubst et al., 2019). To match the scale of these imaging

590 technologies, an important extension of the current work is to extract not only positional  
591 information about cells *in vivo*, but also the entire structure of cells. For oligodendrocytes, that  
592 means the soma, cytosolic branches, and individual myelin sheaths formed by each cell. As  
593 highlighted in this study, gaining quantitative access to even a single parameter, such as soma  
594 volume, can greatly extend biological understanding, allowing robust predictions to be made  
595 with limited data. Here, the strong correlations we observed between soma size, age, and  
596 survival provide us with a tool to infer the regenerative capacity of oligodendrocytes on fixed  
597 timepoint experiments acquired from individual tissue sections or from block-face imaging  
598 (Ragan et al., 2012). By extension, having access to the complete morphological structures of  
599 thousands of oligodendrocytes in the brain would enable us to assess complex region-specific  
600 differences in adaptive myelination, regenerative capacity and survival across the brain in mice  
601 subjected to different interventions.

602         Deep learning is well situated to provide us with the adaptable, reliable tools needed for  
603 the analysis of enormous new imaging datasets that can no longer be practically annotated  
604 using a manual brute force selection approach. Computational power is growing rapidly each  
605 year with new GPUs and the development of dozens of new deep learning techniques. Here, we  
606 demonstrate one powerful application of deep learning to resolve a multi-dimensional tracking  
607 challenge, which not only facilitates analysis of oligodendrocyte dynamics, but also extends our  
608 quantitative limits to extract novel insight into regional differences in regenerative capacity and  
609 allows predictions to be made about future behaviors. Having access to more cellular features  
610 and dynamics will bring us closer to understanding the events that underlie myelin regeneration  
611 that will aid in the discovery of therapeutics for treating demyelinating diseases.

612

613

614

615



616 **ACKNOWLEDGMENTS**

617 We thank Dr. M. Pucak and N. Ye for technical assistance, T. Shelly for machining expertise,  
618 and members of the Bergles laboratory for discussions. Y.K.T.X. was supported by a fellowship  
619 from the Johns Hopkins University Kavli Neuroscience Discovery Institute and C.C. was  
620 supported by a National Science Foundation Graduate Research Fellowship. Funding was  
621 provided by NIH BRAIN Initiative grant R01 RF1MH121539, a Collaborative Research Center  
622 Grant from the National Multiple Sclerosis Society and the Dr. Miriam and Sheldon G Adelson  
623 Medical Research Foundation.

624

625 **Author contributions**

626 Y.K.T.X. model design, conceptualization, data curation, formal analysis, supervision, validation,  
627 investigation, visualization, methodology, writing – original draft, writing – review and editing.

628 C.C. conceptualization, data curation, supervision, methodology, writing – original draft, writing  
629 – review and editing. J.S. methodology, supervision, investigation, writing – original draft, writing  
630 – review and editing. D.E.B. conceptualization, Resources, Supervision, Funding acquisition,  
631 Investigation, Methodology, Writing – original draft, Project administration, Writing – review and  
632 editing.

633

634 **Conflict of Interest**

635 The authors declare that the research was conducted in the absence of any commercial or  
636 financial relationships that could be construed as a potential conflict of interest.

637

638 **REFERENCES**

639

640 Acton, S. T., Wethmar, K., and Ley, K. (2002). Automatic Tracking of Rolling Leukocytes in  
641 *Vivo. Microvascular Research* 63, 139–148. doi:10.1006/mvre.2001.2373.

- 642 Amato, S. P., Pan, F., Schwartz, J., and Ragan, T. M. (2016). Whole Brain Imaging with Serial  
643 Two-Photon Tomography. *Front Neuroanat* 10. doi:10.3389/fnana.2016.00031.
- 644 A. Yakovleva, M., Sh. Radchenko, A., B. Feldman, T., A. Kostyukov, A., M. Arbukhanova, P.,  
645 A. Borzenok, S., et al. (2020). Fluorescence characteristics of lipofuscin fluorophores  
646 from human retinal pigment epithelium. *Photochemical & Photobiological Sciences* 19,  
647 920–930. doi:10.1039/C9PP00406H.
- 648 Baxi, E. G., DeBruin, J., Jin, J., Strasburger, H. J., Smith, M. D., Orthmann-Murphy, J. L., et al.  
649 (2017). Lineage tracing reveals dynamic changes in oligodendrocyte precursor cells  
650 following cuprizone-induced demyelination. *Glia* 65, 2087–2098. doi:10.1002/glia.23229.
- 651 Berg, S., Kutra, D., Kroeger, T., Straehle, C. N., Kausler, B. X., Haubold, C., et al. (2019). ilastik:  
652 interactive machine learning for (bio)image analysis. *Nature Methods* 16, 1226–1232.  
653 doi:10.1038/s41592-019-0582-9.
- 654 Bergles, D. E., and Richardson, W. D. (2015). Oligodendrocyte Development and Plasticity.  
655 *Cold Spring Harb Perspect Biol* 8, a020453. doi:10.1101/cshperspect.a020453.
- 656 Bhardwaj, R. D., Curtis, M. A., Spalding, K. L., Buchholz, B. A., Fink, D., Björk-Eriksson, T., et  
657 al. (2006). Neocortical neurogenesis in humans is restricted to development. *PNAS* 103,  
658 12564–12568. doi:10.1073/pnas.0605177103.
- 659 Bortner, C. D., and Cidlowski, J. A. (2002). Apoptotic volume decrease and the incredible  
660 shrinking cell. *Cell Death & Differentiation* 9, 1307–1310. doi:10.1038/sj.cdd.4401126.
- 661 Chang, A., Staugaitis, S. M., Dutta, R., Batt, C. E., Easley, K. E., Chomyk, A. M., et al. (2012).  
662 Cortical remyelination: A new target for repair therapies in multiple sclerosis. *Annals of*  
663 *Neurology* 72, 918–926. doi:10.1002/ana.23693.
- 664 Ciaparrone, G., Sánchez, F. L., Tabik, S., Troiano, L., Tagliaferri, R., and Herrera, F. (2020).  
665 Deep Learning in Video Multi-Object Tracking: A Survey. *Neurocomputing* 381, 61–88.  
666 doi:10.1016/j.neucom.2019.11.023.
- 667 El Waly, B., Macchi, M., Cayre, M., and Durbec, P. (2014). Oligodendrogenesis in the normal  
668 and pathological central nervous system. *Front. Neurosci.* 8.  
669 doi:10.3389/fnins.2014.00145.
- 670 Giovannucci, A., Friedrich, J., Gunn, P., Kalfon, J., Brown, B. L., Koay, S. A., et al. (2019).  
671 CalmAn an open source tool for scalable calcium imaging data analysis. *eLife* 8,  
672 e38173. doi:10.7554/eLife.38173.
- 673 Gruchot, J., Weyers, V., Göttle, P., Förster, M., Hartung, H.-P., Küry, P., et al. (2019). The  
674 Molecular Basis for Remyelination Failure in Multiple Sclerosis. *Cells* 8.  
675 doi:10.3390/cells8080825.
- 676 Heaven, D. (2019). Why deep-learning AIs are so easy to fool. *Nature* 574, 163–166.  
677 doi:10.1038/d41586-019-03013-5.

- 678 Holtmaat, A., de Paola, V., Wilbrecht, L., Trachtenberg, J. T., Svoboda, K., and Portera-Cailliau,  
679 C. (2012). Imaging neocortical neurons through a chronic cranial window. *Cold Spring*  
680 *Harb Protoc* 2012, 694–701. doi:10.1101/pdb.prot069617.
- 681 Horton, N. G., Wang, K., Kobat, D., Clark, C. G., Wise, F. W., Schaffer, C. B., et al. (2013). In  
682 vivo three-photon microscopy of subcortical structures within an intact mouse brain.  
683 *Nature Photonics* 7, 205–209. doi:10.1038/nphoton.2012.336.
- 684 Hughes, E. G., Kang, S. H., Fukaya, M., and Bergles, D. E. (2013). Oligodendrocyte progenitors  
685 balance growth with self-repulsion to achieve homeostasis in the adult brain. *Nat*  
686 *Neurosci* 16, 668–676. doi:10.1038/nn.3390.
- 687 Hughes, E. G., Orthmann-Murphy, J. L., Langseth, A. J., and Bergles, D. E. (2018). Myelin  
688 remodeling through experience-dependent oligodendrogenesis in the adult  
689 somatosensory cortex. *Nature Neuroscience* 21, 696–706. doi:10.1038/s41593-018-  
690 0121-5.
- 691 Jaccard, P. (1912). The Distribution of the Flora in the Alpine Zone.1. *New Phytologist* 11, 37–  
692 50. doi:10.1111/j.1469-8137.1912.tb05611.x.
- 693 Kirby, L., Jin, J., Cardona, J. G., Smith, M. D., Martin, K. A., Wang, J., et al. (2019).  
694 Oligodendrocyte precursor cells present antigen and are cytotoxic targets in  
695 inflammatory demyelination. *Nature Communications* 10, 3887. doi:10.1038/s41467-  
696 019-11638-3.
- 697 Klabjan, D., and Zhu, X. (2020). Neural Network Retraining for Model Serving.  
698 *arXiv:2004.14203 [cs, stat]*. Available at: <http://arxiv.org/abs/2004.14203> [Accessed  
699 October 31, 2020].
- 700 Kuhn, S., Gritti, L., Crooks, D., and Dombrowski, Y. (2019). Oligodendrocytes in Development,  
701 Myelin Generation and Beyond. *Cells* 8. doi:10.3390/cells8111424.
- 702 Lampron, A., Laroche, A., Laflamme, N., Préfontaine, P., Plante, M.-M., Sánchez, M. G., et al.  
703 (2015). Inefficient clearance of myelin debris by microglia impairs remyelinating  
704 processes. *J Exp Med* 212, 481–495. doi:10.1084/jem.20141656.
- 705 Larson, V. A., Mironova, Y., Vanderpool, K. G., Waisman, A., Rash, J. E., Agarwal, A., et al.  
706 (2018). Oligodendrocytes control potassium accumulation in white matter and seizure  
707 susceptibility. *Elife* 7. doi:10.7554/eLife.34829.
- 708 Lecoq, J., Orlova, N., and Grewe, B. F. (2019). Wide. Fast. Deep: Recent Advances in  
709 Multiphoton Microscopy of In Vivo Neuronal Activity. *J. Neurosci.* 39, 9042–9052.  
710 doi:10.1523/JNEUROSCI.1527-18.2019.
- 711 Loshchilov, I., and Hutter, F. (2019). Decoupled Weight Decay Regularization.  
712 *arXiv:1711.05101 [cs, math]*. Available at: <http://arxiv.org/abs/1711.05101> [Accessed  
713 October 30, 2020].
- 714 Lugagne, J.-B., Lin, H., and Dunlop, M. J. (2020). DeLTA: Automated cell segmentation,  
715 tracking, and lineage reconstruction using deep learning. *PLoS Comput Biol* 16.  
716 doi:10.1371/journal.pcbi.1007673.

- 717 Marshall, L., Call, C., Bergles, D. E., and Morehead, M. Quicker, cost effective tracking of 4D  
718 data.
- 719 Miller, M. A., and Zachary, J. F. (2017). Mechanisms and Morphology of Cellular Injury,  
720 Adaptation, and Death. *Pathologic Basis of Veterinary Disease*, 2-43.e19.  
721 doi:10.1016/B978-0-323-35775-3.00001-1.
- 722 Ming, G., and Song, H. (2011). Adult Neurogenesis in the Mammalian Brain: Significant  
723 Answers and Significant Questions. *Neuron* 70, 687–702.  
724 doi:10.1016/j.neuron.2011.05.001.
- 725 Moreno-García, A., Kun, A., Calero, O., Medina, M., and Calero, M. (2018). An Overview of the  
726 Role of Lipofuscin in Age-Related Neurodegeneration. *Front. Neurosci.* 12.  
727 doi:10.3389/fnins.2018.00464.
- 728 Narayanan, R. T., Udvary, D., and Oberlaender, M. (2017). Cell Type-Specific Structural  
729 Organization of the Six Layers in Rat Barrel Cortex. *Front. Neuroanat.* 11.  
730 doi:10.3389/fnana.2017.00091.
- 731 Neyshabur, B., Bhojanapalli, S., McAllester, D., and Srebro, N. (2017). Exploring Generalization  
732 in Deep Learning. *arXiv:1706.08947 [cs]*. Available at: <http://arxiv.org/abs/1706.08947>  
733 [Accessed November 1, 2020].
- 734 Nguyen, N. H., Keller, S., Norris, E., Huynh, T. T., Clemens, M. G., and Shin, M. C. (2011).  
735 Tracking Colliding Cells In Vivo Microscopy. *IEEE Transactions on Biomedical*  
736 *Engineering* 58, 2391–2400. doi:10.1109/TBME.2011.2158099.
- 737 Nketia, T. A., Sailem, H., Rohde, G., Machiraju, R., and Rittscher, J. (2017). Analysis of live cell  
738 images: Methods, tools and opportunities. *Methods* 115, 65–79.  
739 doi:10.1016/j.ymeth.2017.02.007.
- 740 Orthmann-Murphy, J., Call, C. L., Molina-Castro, G. C., Hsieh, Y. C., Rasband, M. N., Calabresi,  
741 P. A., et al. (2020). Remyelination alters the pattern of myelin in the cerebral cortex.  
742 *eLife* 9, e56621. doi:10.7554/eLife.56621.
- 743 Otsu, N. (1979). A Threshold Selection Method from Gray-Level Histograms. *IEEE Transactions*  
744 *on Systems, Man, and Cybernetics* 9, 62–66. doi:10.1109/TSMC.1979.4310076.
- 745 Pachitariu, M., Stringer, C., Dipoppa, M., Schröder, S., Rossi, L. F., Dalgleish, H., et al. (2017).  
746 Suite2p: beyond 10,000 neurons with standard two-photon microscopy. *bioRxiv*, 061507.  
747 doi:10.1101/061507.
- 748 Parslow, A., Cardona, A., and Bryson-Richardson, R. J. (2014). Sample Drift Correction  
749 Following 4D Confocal Time-lapse Imaging. *J Vis Exp*. doi:10.3791/51086.
- 750 Paszke, A., Gross, S., Chintala, S., Chanan, G., Yang, E., DeVito, Z., et al. (2017). Automatic  
751 differentiation in PyTorch. Available at: <https://openreview.net/forum?id=BJJsrnfCZ>  
752 [Accessed October 30, 2020].
- 753 Pérez-García, F., Sparks, R., and Ourselin, S. (2021). TorchIO: a Python library for efficient  
754 loading, preprocessing, augmentation and patch-based sampling of medical images in

- 755 deep learning. *arXiv:2003.04696 [cs, eess, stat]*. Available at:  
756 <http://arxiv.org/abs/2003.04696> [Accessed January 18, 2021].
- 757 Pidhorskyi, S., Morehead, M., Jones, Q., Spirou, G., and Doretto, G. (2018). syGlass:  
758 Interactive Exploration of Multidimensional Images Using Virtual Reality Head-mounted  
759 Displays. *arXiv:1804.08197 [cs]*. Available at: <http://arxiv.org/abs/1804.08197> [Accessed  
760 October 30, 2020].
- 761 Ragan, T., Kadiri, L. R., Venkataraju, K. U., Bahlmann, K., Sutin, J., Taranda, J., et al. (2012).  
762 Serial two-photon tomography: an automated method for ex-vivo mouse brain imaging.  
763 *Nat Methods* 9, 255–258. doi:10.1038/nmeth.1854.
- 764 Ronneberger, O., Fischer, P., and Brox, T. (2015). U-Net: Convolutional Networks for  
765 Biomedical Image Segmentation. Available at: <https://arxiv.org/abs/1505.04597v1>  
766 [Accessed March 7, 2020].
- 767 Schindelin, J., Arganda-Carreras, I., Frise, E., Kaynig, V., Longair, M., Pietzsch, T., et al. (2012).  
768 Fiji: an open-source platform for biological-image analysis. *Nature Methods* 9, 676–682.  
769 doi:10.1038/nmeth.2019.
- 770 Simons, M., and Nave, K.-A. (2016). Oligodendrocytes: Myelination and Axonal Support. *Cold*  
771 *Spring Harb Perspect Biol* 8. doi:10.1101/cshperspect.a020479.
- 772 Skripuletz, T., Lindner, M., Kotsiari, A., Garde, N., Fokuhl, J., Linsmeier, F., et al. (2008).  
773 Cortical Demyelination Is Prominent in the Murine Cuprizone Model and Is Strain-  
774 Dependent. *The American Journal of Pathology* 172, 1053–1061.  
775 doi:10.2353/ajpath.2008.070850.
- 776 Streichan, S. J., Hoerner, C. R., Schneidt, T., Holzer, D., and Hufnagel, L. (2014). Spatial  
777 constraints control cell proliferation in tissues. *Proc Natl Acad Sci U S A* 111, 5586–  
778 5591. doi:10.1073/pnas.1323016111.
- 779 Su, Z., Yuan, Y., Chen, J., Zhu, Y., Qiu, Y., Zhu, F., et al. (2011). Reactive Astrocytes Inhibit the  
780 Survival and Differentiation of Oligodendrocyte Precursor Cells by Secreted TNF- $\alpha$ .  
781 *Journal of Neurotrauma* 28, 1089–1100. doi:10.1089/neu.2010.1597.
- 782 Theer, P., and Denk, W. (2006). On the fundamental imaging-depth limit in two-photon  
783 microscopy. *J. Opt. Soc. Am. A, JOSAA* 23, 3139–3149. doi:10.1364/JOSAA.23.003139.
- 784 Van Valen, D. A., Kudo, T., Lane, K. M., Macklin, D. N., Quach, N. T., DeFelice, M. M., et al.  
785 (2016). Deep Learning Automates the Quantitative Analysis of Individual Cells in Live-  
786 Cell Imaging Experiments. *PLoS Comput Biol* 12. doi:10.1371/journal.pcbi.1005177.
- 787 Wang, J., Su, X., Zhao, L., and Zhang, J. (2020). Deep Reinforcement Learning for Data  
788 Association in Cell Tracking. *Front Bioeng Biotechnol* 8. doi:10.3389/fbioe.2020.00298.
- 789 Winnubst, J., Bas, E., Ferreira, T. A., Wu, Z., Economo, M. N., Edson, P., et al. (2019).  
790 Reconstruction of 1,000 Projection Neurons Reveals New Cell Types and Organization  
791 of Long-Range Connectivity in the Mouse Brain. *Cell* 179, 268-281.e13.  
792 doi:10.1016/j.cell.2019.07.042.

- 793 Xu, Y. K. T., Chitsaz, D., Brown, R. A., Cui, Q. L., Dabarno, M. A., Antel, J. P., et al. (2019).  
794 Deep learning for high-throughput quantification of oligodendrocyte ensheathment at  
795 single-cell resolution. *Commun Biol* 2, 1–12. doi:10.1038/s42003-019-0356-z.
- 796 Yampolskiy, R. V. (2019). Unpredictability of AI. *arXiv:1905.13053 [cs]*. Available at:  
797 <http://arxiv.org/abs/1905.13053> [Accessed October 31, 2020].
- 798 Zhang, Y., Zhang, J., Navrazhina, K., Argaw, A. T., Zameer, A., Gurfein, B. T., et al. (2010).  
799 TGF $\beta$ 1 induces Jagged1 expression in astrocytes via ALK5 and Smad3 and regulates  
800 the balance between oligodendrocyte progenitor proliferation and differentiation. *Glia* 58,  
801 964–974. doi:10.1002/glia.20978.
- 802 Zhong, B., Pan, S., Wang, C., Wang, T., Du, J., Chen, D., et al. (2016). Robust Individual-  
803 Cell/Object Tracking via PCANet Deep Network in Biomedicine and Computer Vision.  
804 *Biomed Res Int* 2016. doi:10.1155/2016/8182416.
- 805 Zhou Wang, Bovik, A. C., Sheikh, H. R., and Simoncelli, E. P. (2004). Image quality  
806 assessment: from error visibility to structural similarity. *IEEE Transactions on Image*  
807 *Processing* 13, 600–612. doi:10.1109/TIP.2003.819861.
- 808 Zhu, X., Li, X., Li, Z., and Zhu, B. (2012). Study on Signal-to-noise ratio algorithms based on no-  
809 reference Image quality assessment. in *2012 International Conference on Systems and*  
810 *Informatics (ICSAI2012)*, 1755–1759. doi:10.1109/ICSAI.2012.6223383.
- 811 Zhuang, F., Qi, Z., Duan, K., Xi, D., Zhu, Y., Zhu, H., et al. (2020). A Comprehensive Survey on  
812 Transfer Learning. *arXiv:1911.02685 [cs, stat]*. Available at:  
813 <http://arxiv.org/abs/1911.02685> [Accessed October 30, 2020].
- 814

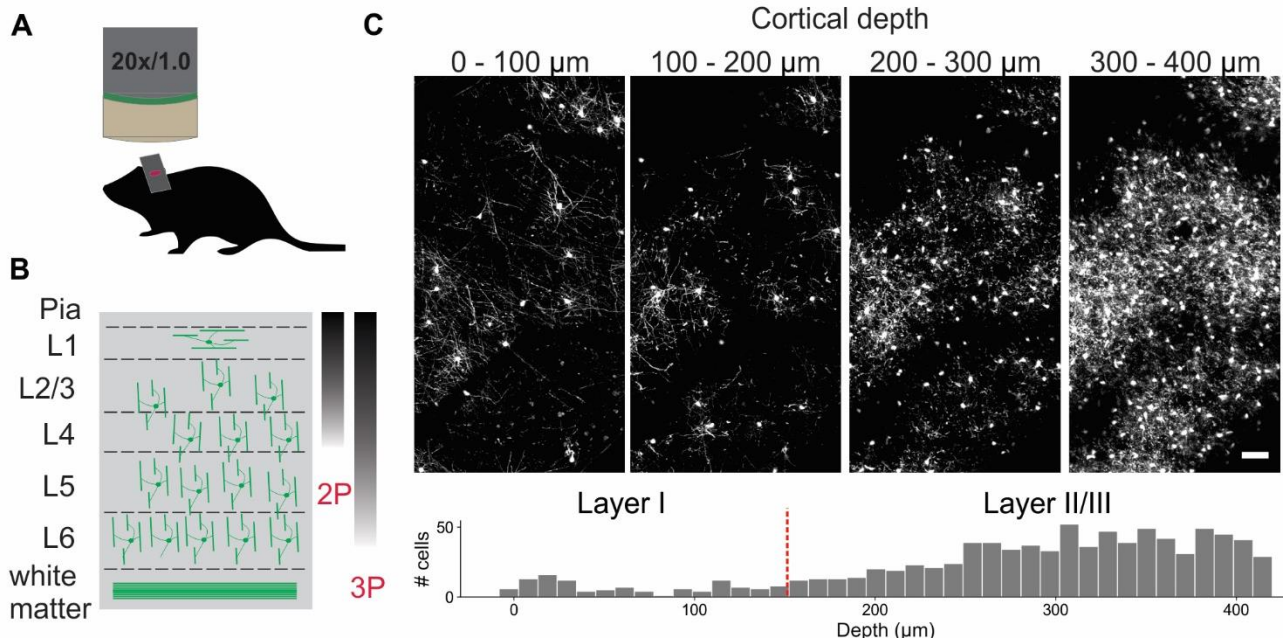

815  
816 **Figure 1: *In vivo* imaging of oligodendrocytes.** (A) Cranial windows were surgically  
817 implanted in adult *Mobp-EGFP* mice in which only oligodendrocytes express EGFP. (B)  
818 Orientation of oligodendrocytes from imaging surface to white matter. Oligodendrocytes in upper  
819 cortical layers myelinate horizontally aligned axons, while those in deeper cortical layers are  
820 aligned perpendicularly to pial surface. Standard imaging range of two-photon and three-photon  
821 microscopy highlighted with approximate gradients (Theer and Denk, 2006; Lecoq et al., 2019)  
822 (C) XY maximum projections of 100  $\mu\text{m}$  thick volumes at indicated depths (0 – 100  $\mu\text{m}$ , 100 –  
823 200  $\mu\text{m}$ , 200 – 300  $\mu\text{m}$ , 300 – 400  $\mu\text{m}$ ). Layer depths as estimated in somatosensory cortex  
824 (Narayanan et al., 2017). Oligodendrocyte density increases rapidly with depth, increasing the  
825 time needed for manual tracking. Scale bar: 50  $\mu\text{m}$ .

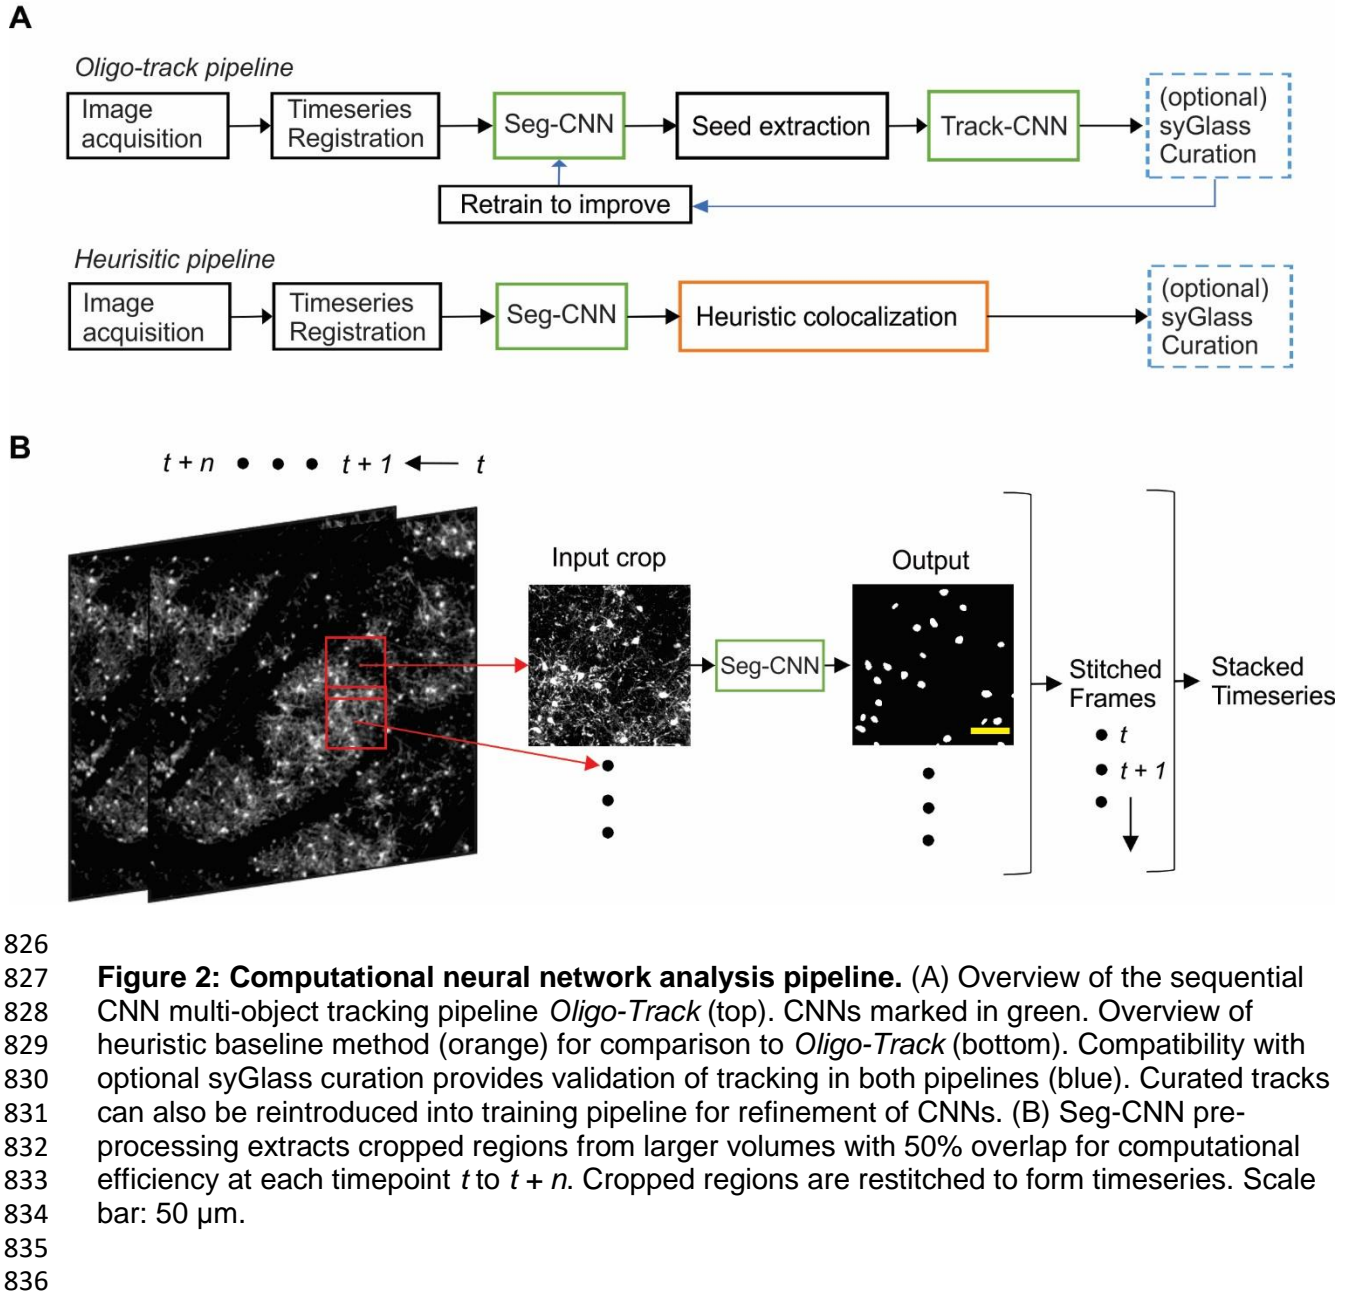



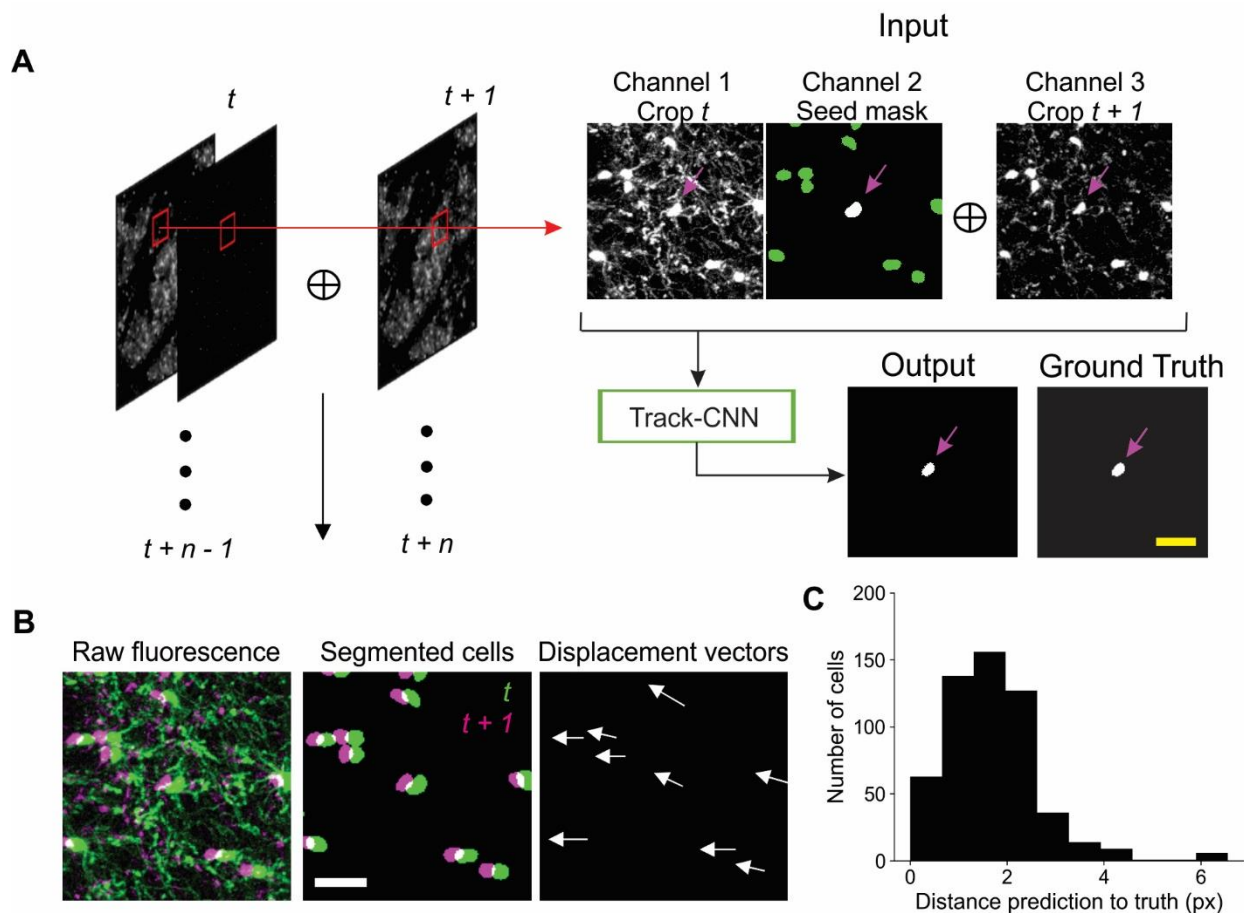

837 **Figure 3: Track-CNN processing steps.** (A) Crops are taken from each pair of timepoints  $t$   
838 and  $t + 1$  centered around a cell denoted by magenta arrow on *channel 1*. *Channel 1* contains  
839 raw fluorescence from timepoint  $t$ . *Channel 2* contains seed mask of cell of interest (magenta  
840 arrow). Adjacent segmented cells are set to a lower value (green). *Channel 3* contains raw  
841 fluorescence from timepoint  $t + 1$ . Cropped images are concatenated together to form input to  
842 network. The network output is a semantic segmentation indicating the location of the seed  
843 masked cell on timepoint  $t + 1$ . This procedure is repeated for all cells on all consecutive  
844 timepoints. Scale bar: 30  $\mu\text{m}$ . (B) Example showing local coherence in how tracked cells in a  
845 local region shift between timepoint  $t$  (green) and  $t + 1$  (magenta), allowing for predictive post-  
846 processing using average movement vectors (right). Scale bar: 30  $\mu\text{m}$ . (C) Distribution of  
847 distances from predicted to actual location of cell on timepoint  $t + 1$  given any cell on timepoint  $t$ .  
848 The prediction is generated by taking the average displacement vector of five nearest neighbor  
849 tracks. Differences between predicted and actual location were typically within 6 pixels.  
850

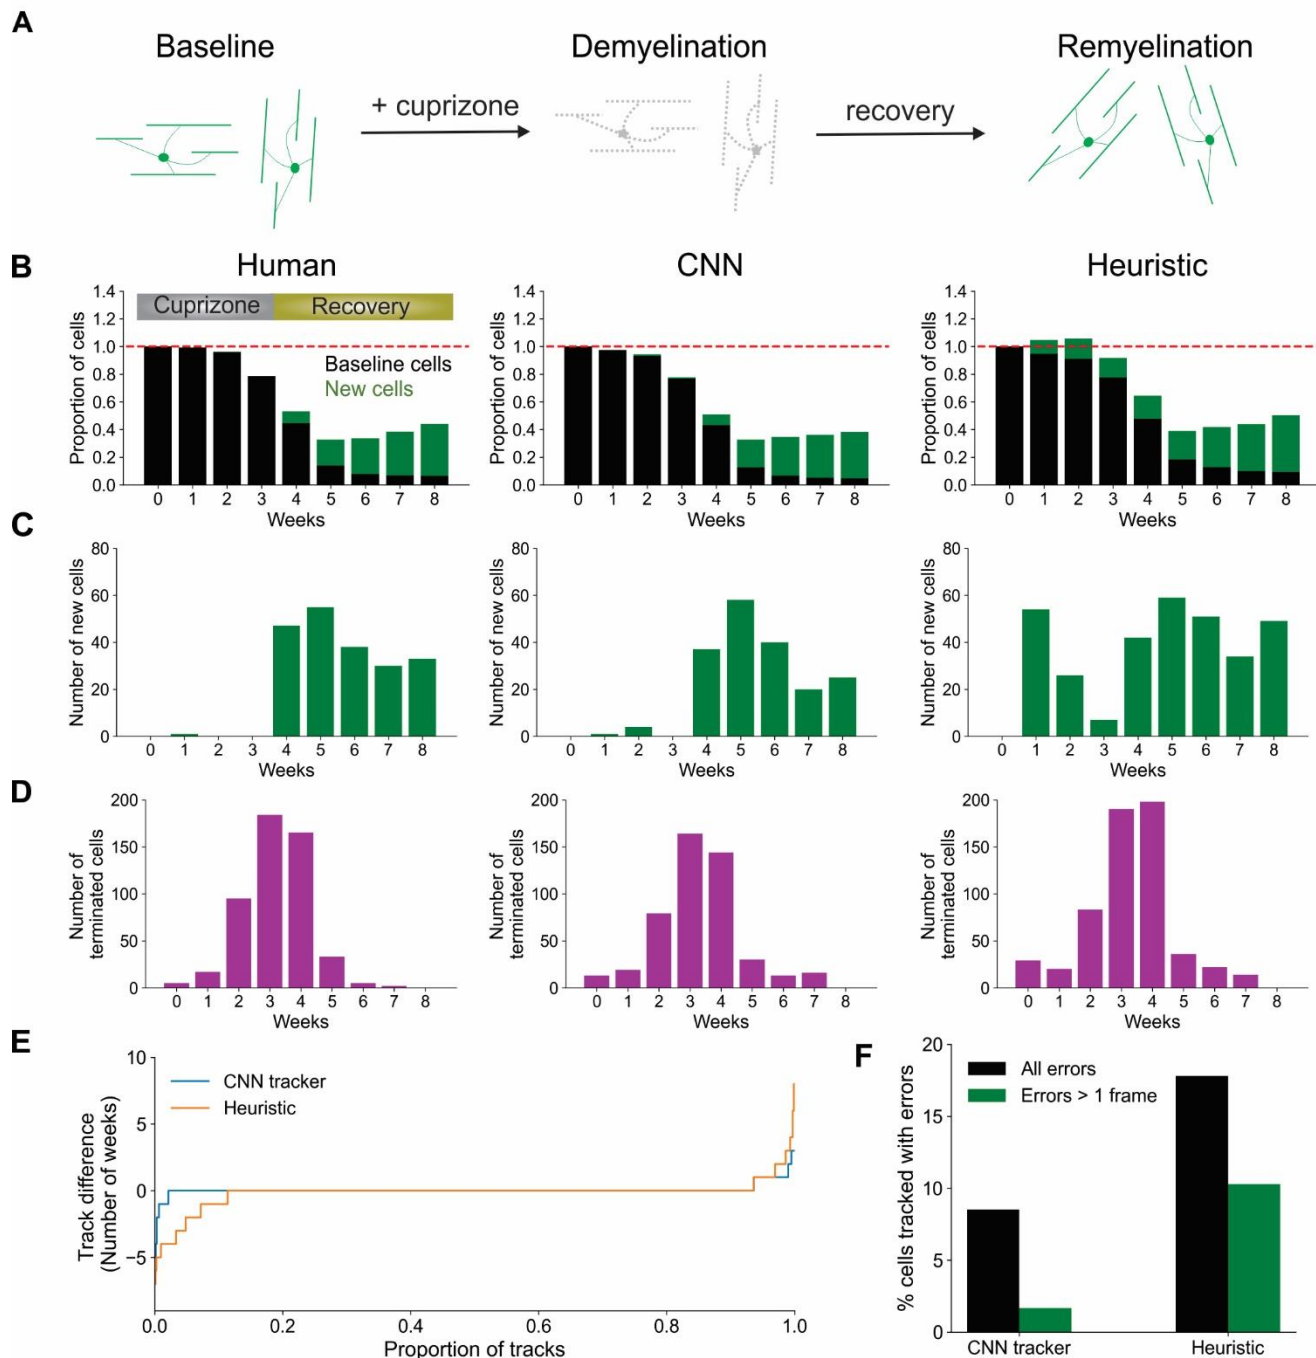

851  
 852 **Figure 4: CNN-based tracking outperforms heuristic tracking.** (A) Diagram illustrating  
 853 cuprizone induced oligodendrocyte loss and recovery during the imaging period. (B) Overall  
 854 normalized trends for human, CNN and heuristic tracking methods on test timeseries withheld  
 855 from training data. (C) Number of new cells detected per timepoint for each method. (D) Number  
 856 of cells terminated per timepoint for each method. (E) Track difference (length of track in ground  
 857 truth - length of track by machine count) comparing ground truth to CNN and heuristic methods,  
 858 respectively. (F) Comparison of major errors, defined as under- or over-tracking for > 1  
 859 timepoint, and total errors by CNN and heuristic methods.  
 860

861

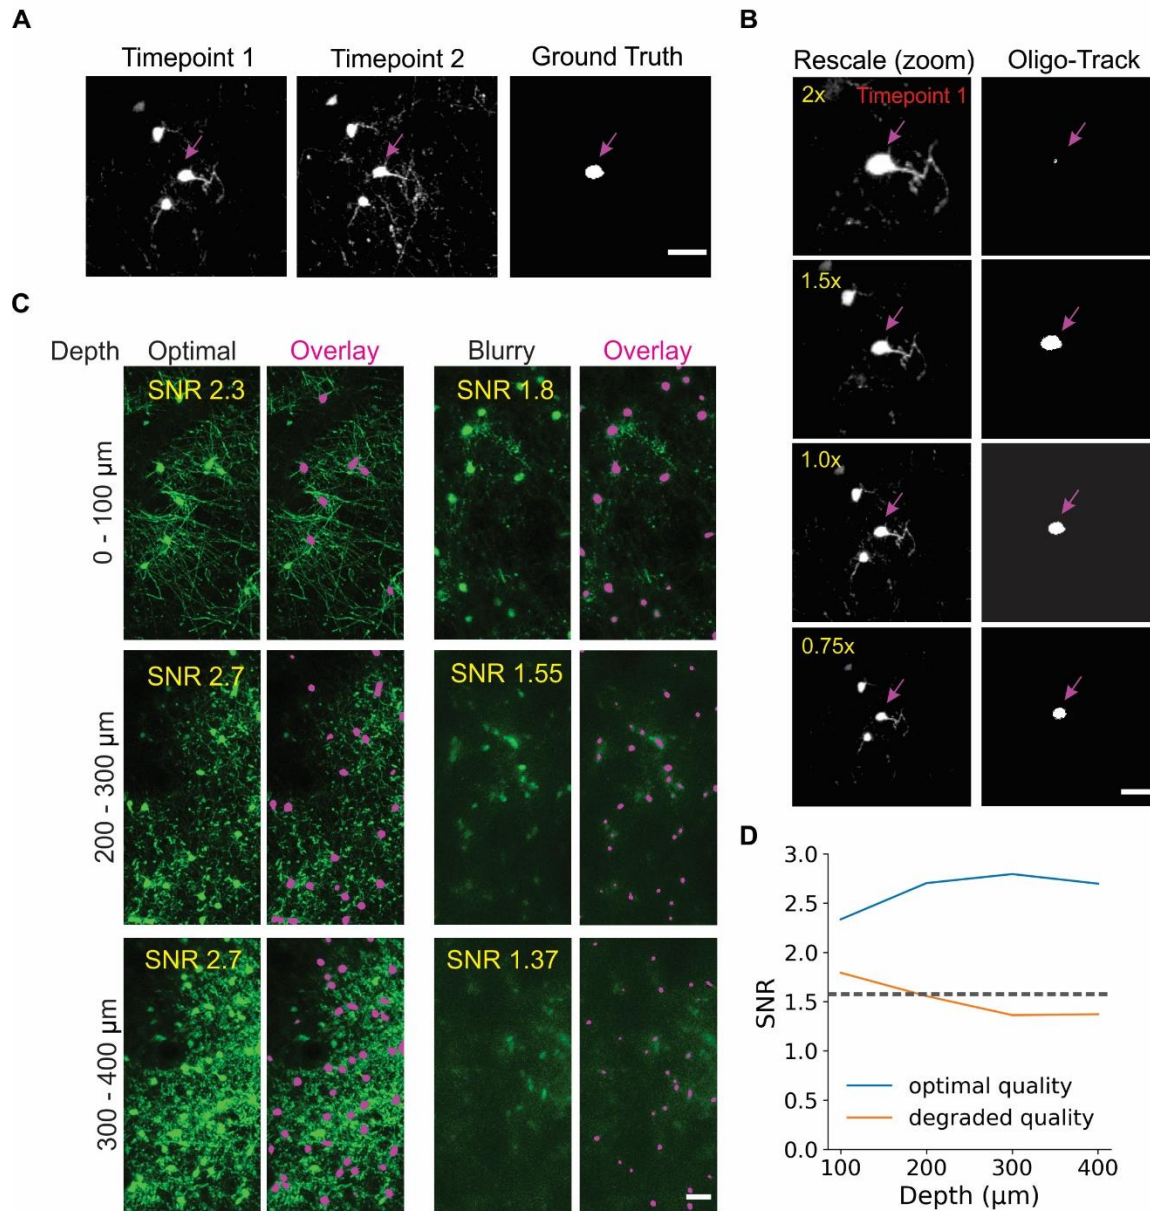

862 **Figure 5: Oligo-Track enables robust cell tracking under different experimental**  
 863 **conditions.** (A) Input image for Track-CNN used in (B) to assess impact of different rescaling  
 864 on Track-CNN performance. Cell of interest denoted by magenta arrow. Scale bar: 30 μm. (C)  
 865 Representative XY maximum projections at indicated SNR values and depths in a volume with  
 866 optimal image quality (left), and a volume with a less transparent cranial window (right). Overlay  
 867 of cells detected by *Oligo-Track* in Magenta. Scale bar: 30 μm. (D) Plotting average SNR across  
 868 depth of optimal quality and degraded quality volumes. Dashed grey line indicates human  
 869 perceptual limit for reliably tracing data. Also represents point at which algorithm will provide  
 870 warning to user.

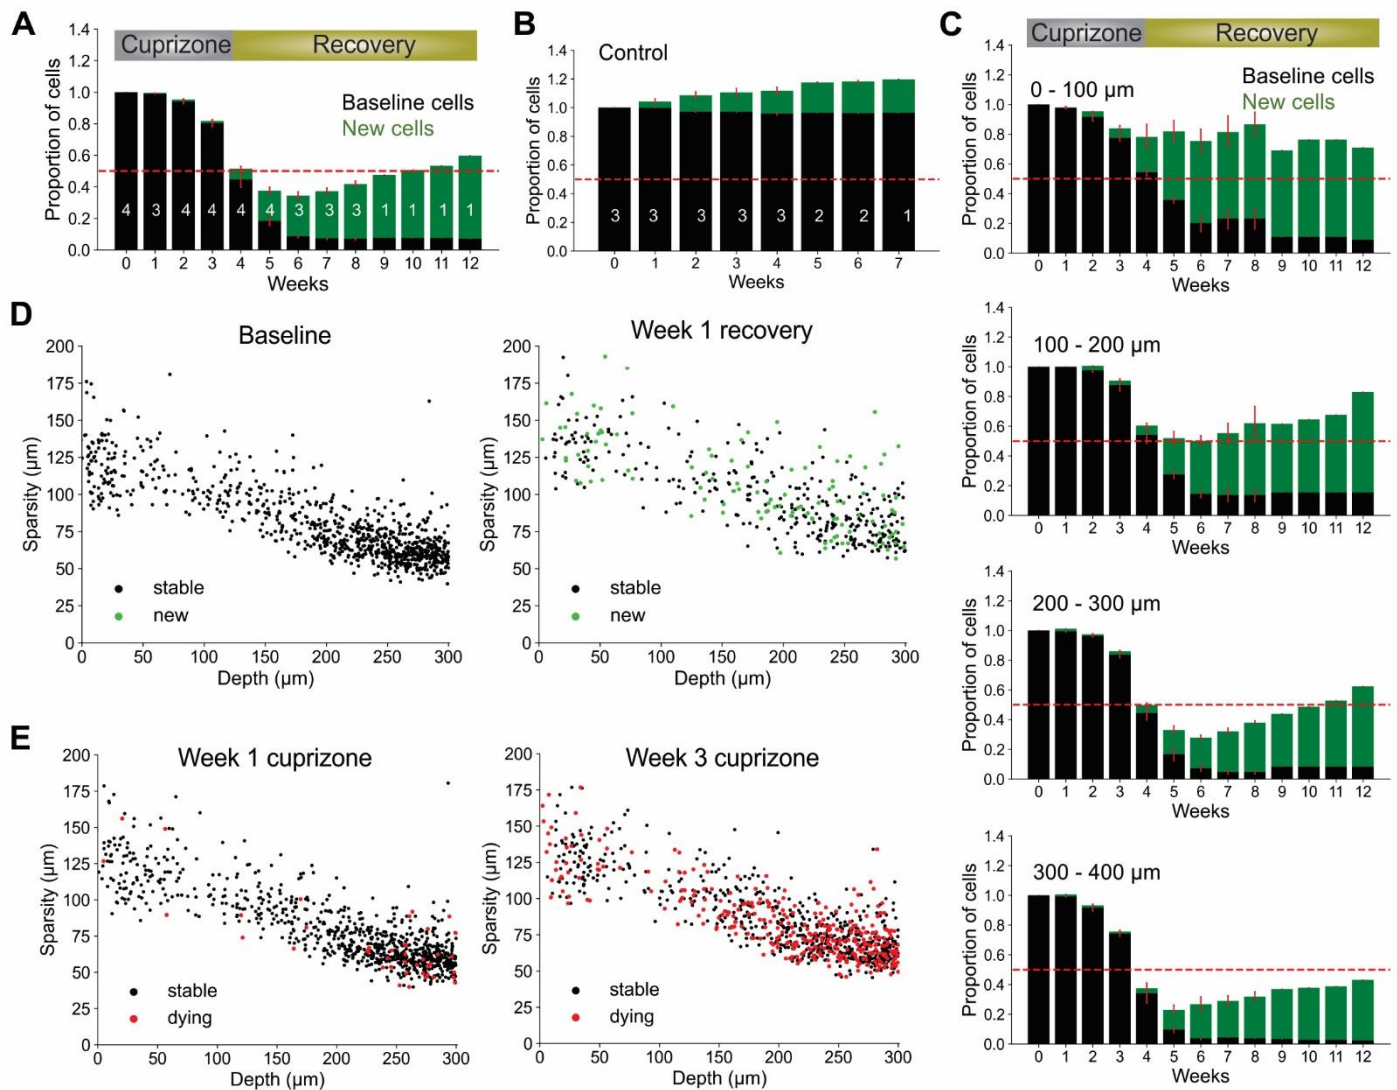

871

872

873

874

875

876

877

878

879

880

881

882

883

884

885

886

887

**Figure 6: Local oligodendrocyte density does not correlate with region specific suppression of regeneration.** (A) Normalized values for baseline and newly formed oligodendrocytes across weeks of cuprizone treatment and recovery. Bars indicate cell numbers averaged across animals for each week. (B) Normalized values for baseline and newly formed cells in no treatment condition. (C) Cortical depth-specific changes in oligodendrocyte regeneration showing suppressed regeneration in deeper layers. Volume split into 4 sections based on depth (0 – 100  $\mu\text{m}$ , 100 – 200  $\mu\text{m}$ , 200 – 300  $\mu\text{m}$ , 300 – 400  $\mu\text{m}$ ). (D) Cell sparsity (average distance to 10 nearest neighbors) of stable and newly formed oligodendrocytes at baseline and week 2 of recovery shows no obvious clustering patterns at any timepoint. (E) Sparsity of cells that will die within one week (red) at week 1 and week 3 of cuprizone also shows no obvious clustering patterns at any timepoint. Cells pooled from  $n = 4$  cuprizone treated and  $n = 3$  control mice.

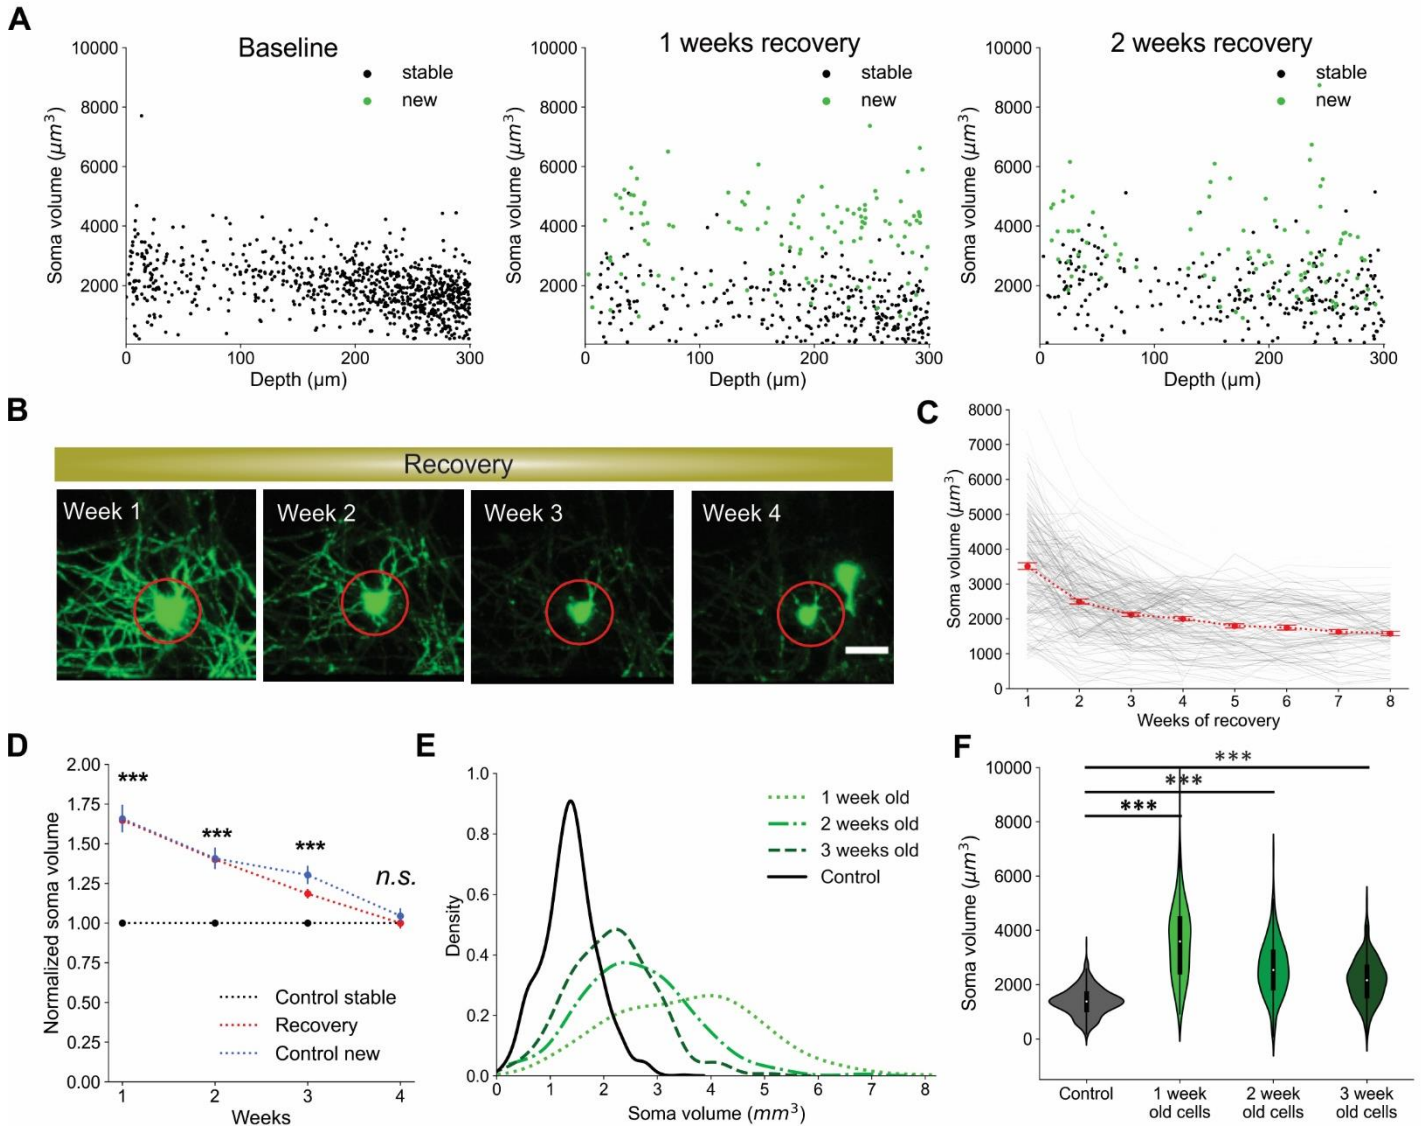

888 **Figure 7: Newly generated oligodendrocytes can be identified by cell soma volume.** (A)  
 889 Soma volume of stable and newly formed oligodendrocytes at baseline, 1 week recovery, and 2  
 890 weeks recovery across different cortical depths. (B) Representative example of the change in  
 891 soma size of newly formed oligodendrocyte tracked across 4 weeks of recovery. Scale bar: 20  
 892  $\mu\text{m}$ . (C) Plot of decrease in soma volume for 250 cells over weeks relative to time of cell  
 893 generation. Red dots are mean  $\pm$  SEM. (D) Comparison of soma volume in newly formed  
 894 oligodendrocytes during recovery compared with stable cells in non-treated mice. Also includes  
 895 comparison of soma volume between spontaneously formed oligodendrocytes and stable cells  
 896 in non-treated mice. All values are normalized to the mean soma volume of stable control cells  
 897 at each matched timepoint. (E) Kernel density estimate for each distribution of soma volumes at  
 898 indicated timepoints. These normalized distributions help visualize the probability that a cell with  
 899 a certain soma volume is within a certain age range post-oligodendrogenesis. (F) Distribution of  
 900 soma volumes of cells that are 1, 2, and 3 weeks old relative to cells in mice that are not treated  
 901 with cuprizone at matched timepoints. Cells pooled from  $n = 4$  cuprizone treated and  $n = 3$   
 902 control mice. See Supplementary file 1 for statistical tests and significance level for each  
 903 comparison.

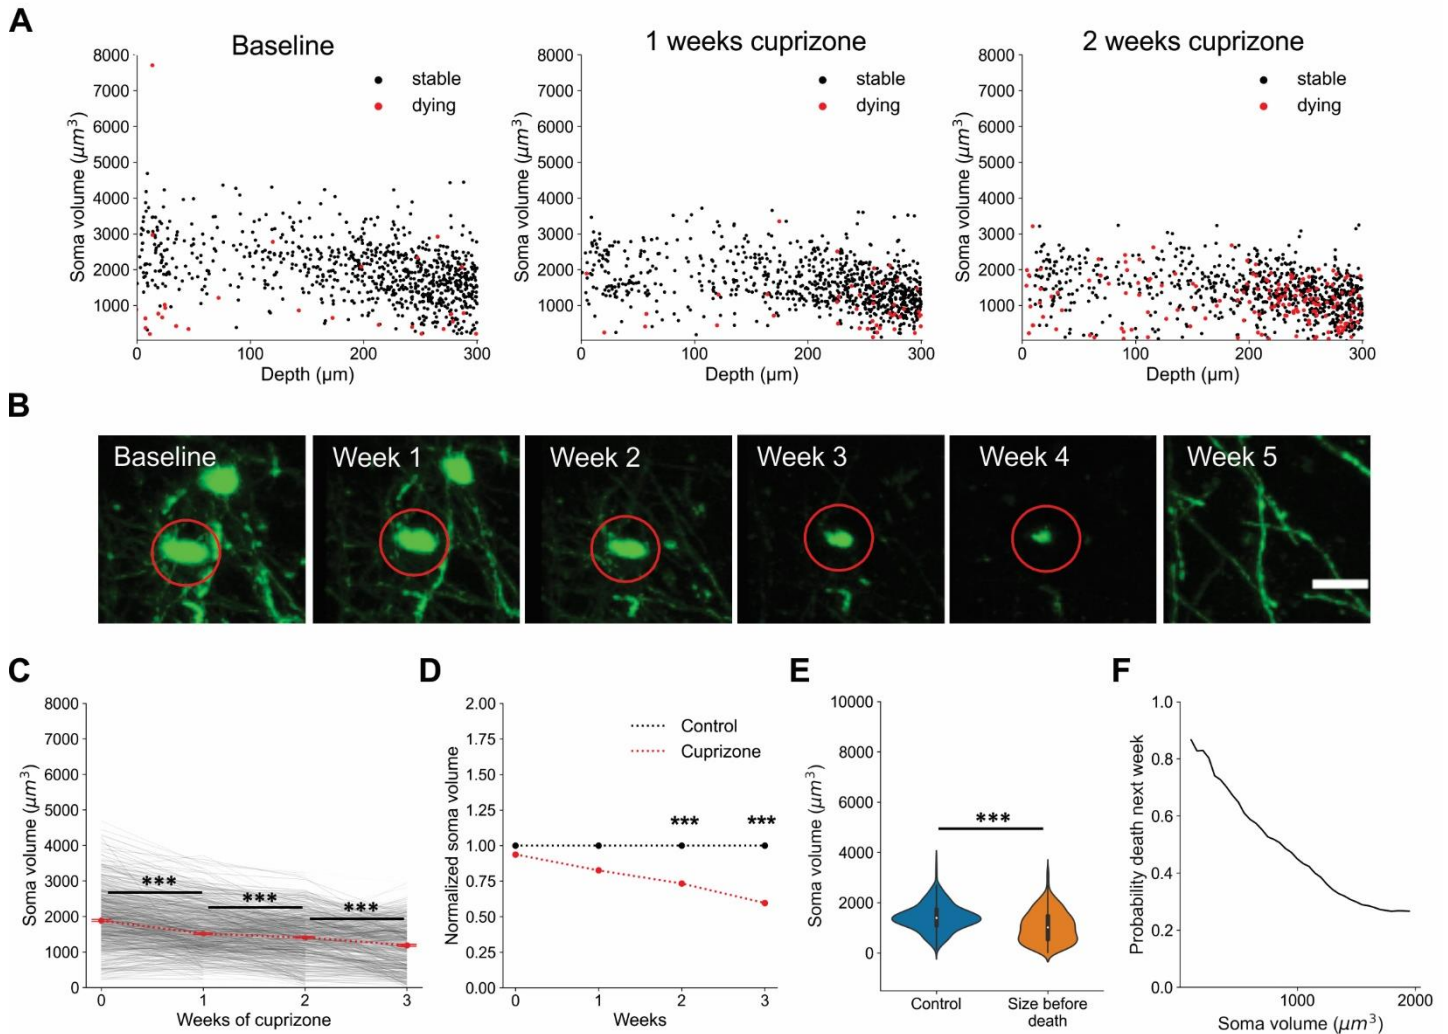

904 **Figure 8: Oligodendrocyte death can be predicted from cell soma volume.** (A) Volume of  
 905 cell somata within 1 week of dying (red) at baseline, 1 week cuprizone, and 2 week cuprizone  
 906 timepoints. (B) Representative example of cell soma shrinkage throughout cuprizone treatment,  
 907 resulting in eventual death. Scale bar: 20  $\mu\text{m}$ . (C) Plot of soma volume decrease for 860 cells  
 908 during cuprizone treatment. (D) Plot of average soma volume of dying cells at each timepoint of  
 909 cuprizone treatment relative to timepoint matched cells from control mice. All values are  
 910 normalized to the mean soma volume of stable control cells at each matched timepoint. (E)  
 911 Overall distribution of soma volumes for non-treated cells and cells within 1 week of death  
 912 during cuprizone treatment. (F) Probability that a cell soma below a certain volume is within 1  
 913 week of death. Cells pooled from  $n = 4$  cuprizone treated and  $n = 3$  control mice.  
 914 See Supplementary file 1 for statistical tests and significance level for each comparison.

915  
 916

917 **Video 1: Cell tracking across two stable timepoints.** Timepoint  $t$  (left) and  $t + 1$  (right).  
 918 Magenta indicates the cell that is currently undergoing assessment by Track-CNN. After  
 919 assessment, a color is assigned to the cell on  $t$  and  $t + 1$  to represent a tracked cell across  
 920 timepoints. If the cell is untracked (or dies between timepoints), the cell soma is set to pure  
 921 white on  $t$ .

922

923 [https://www.dropbox.com/s/nz9ll1n2ucw5v7w/Video\\_1\\_tracking\\_stable\\_cells\\_compressed.mp4](https://www.dropbox.com/s/nz9ll1n2ucw5v7w/Video_1_tracking_stable_cells_compressed.mp4?dl=0)  
924 [?dl=0](https://www.dropbox.com/s/nz9ll1n2ucw5v7w/Video_1_tracking_stable_cells_compressed.mp4?dl=0)

925  
926 **Video 2: Cell tracking across cuprizone injury timepoints.** Timepoint  $t$  (left) and  $t + 1$  (right).  
927 Magenta indicates the cell that is currently undergoing assessment by Track-CNN. After  
928 assessment, a color is assigned to the cell on  $t$  and  $t + 1$  to represent a tracked cell across  
929 timepoints. If the cell is untracked (or dies between timepoints), the cell soma is set to pure  
930 white on  $t$ .

931  
932 [https://www.dropbox.com/s/zd647mqtnwsiokz/Video\\_2\\_tracking\\_cuprizone\\_cells\\_compressed.](https://www.dropbox.com/s/zd647mqtnwsiokz/Video_2_tracking_cuprizone_cells_compressed.mp4?dl=0)  
933 [mp4?dl=0](https://www.dropbox.com/s/zd647mqtnwsiokz/Video_2_tracking_cuprizone_cells_compressed.mp4?dl=0)

934  
935 **Video 3: Cell sparsity over weeks of cuprizone treatment and recovery.** Newly formed cells  
936 marked in green (left) and cells that will die within a week marked in red (right) starting from  
937 baseline followed by three weeks of cuprizone treatment and subsequent recovery.

938  
939 [https://www.dropbox.com/s/vaem5qncd2jz5fh/Video\\_3\\_sparsity\\_over\\_weeks\\_compressed.avi?](https://www.dropbox.com/s/vaem5qncd2jz5fh/Video_3_sparsity_over_weeks_compressed.avi?dl=0)  
940 [dl=0](https://www.dropbox.com/s/vaem5qncd2jz5fh/Video_3_sparsity_over_weeks_compressed.avi?dl=0)

941  
942 **Video 4: Soma size of dying and newly formed cells over weeks of cuprizone treatment.**  
943 Newly formed cells marked in green (left) and cells that will die within a week a marked in red  
944 (right) starting from baseline followed by three weeks of cuprizone treatment and subsequent  
945 recovery.

946  
947 [https://www.dropbox.com/s/vb2sqbilrcpuzdp/Video\\_4\\_volume\\_over\\_weeks\\_compressed.avi?dl](https://www.dropbox.com/s/vb2sqbilrcpuzdp/Video_4_volume_over_weeks_compressed.avi?dl=0)  
948 [=0](https://www.dropbox.com/s/vb2sqbilrcpuzdp/Video_4_volume_over_weeks_compressed.avi?dl=0)

949
